# Supplementary material
Source: publisher site journal article supplement (https://www.spandidos-publications.com/5514/downloadSupplementary)
Supplement: Supplementary file 1 [file downloadSupplementary]

## Sheet: Sheet1
Table SVII. Data associated with GNPNAT1 from GSEA.
Query	Statistic	P-value	FDR (BH)	Event_SD	Event_TD
A1BG	-0.255261	1.01869e-17	9.40094e-17	1093	1093
A1CF	0.0176258	0.560502	0.620946	1093	200
A2BP1	-0.0453969	0.13364	0.17496	1093	510
A2LD1	0.00777473	0.797374	0.833605	1093	1093
A2ML1	-0.0145365	0.631186	0.686835	1093	991
A2M	-0.199247	3.00305e-11	1.36229e-10	1093	1093
A4GALT	-0.279147	5.16448e-21	7.01889e-20	1093	1093
A4GNT	-0.0751691	0.0129259	0.0206828	1093	710
AAA1	0.0154391	0.610142	0.667685	1093	96
AAAS	-0.0283392	0.34926	0.412356	1093	1093
AACSL	0.0574451	0.0576223	0.0820994	1093	561
AACS	0.171263	1.21424e-08	4.12908e-08	1093	1093
AADACL2	-0.0161301	0.594246	0.652948	1093	142
AADACL3	-0.0881367	0.00354334	0.00621062	1093	198
AADACL4	-0.0740349	0.0143575	0.0227514	1093	73
AADAC	-0.0189076	0.532342	0.594128	1093	666
AADAT	0.0108439	0.720264	0.766834	1093	1093
AAGAB	0.267553	2.25883e-19	2.52226e-18	1093	1093
AAK1	0.0243971	0.42037	0.484507	1093	1093
AAMP	-0.196188	6.05602e-11	2.65173e-10	1093	1093
AANAT	-0.142702	2.17262e-06	5.75341e-06	1093	581
AARS2	-0.197244	4.75964e-11	2.10374e-10	1093	1093
AARSD1	-0.194912	8.08779e-11	3.48286e-10	1093	1093
AARS	0.0454729	0.13299	0.17416	1093	1093
AASDHPPT	0.294364	2.73877e-23	4.89796e-22	1093	1093
AASDH	0.171853	1.08015e-08	3.70058e-08	1093	1093
AASS	-0.149157	7.29693e-07	2.03388e-06	1093	1093
AATF	-0.0610127	0.0437286	0.0636491	1093	1093
AATK	-0.168173	2.22633e-08	7.37778e-08	1093	1093
ABAT	0.0684842	0.0235622	0.0359388	1093	1093
ABCA10	-0.19724	4.76459e-11	2.10546e-10	1093	1083
ABCA11P	0.00311865	0.917974	0.934432	1093	1093
ABCA12	0.26157	1.47895e-18	1.50928e-17	1093	1084
ABCA13	-0.189684	2.59269e-10	1.05439e-09	1093	913
ABCA17P	-0.208359	3.47436e-12	1.74193e-11	1093	1089
ABCA1	0.110695	0.000245677	0.000504702	1093	1093
ABCA2	-0.0845103	0.00517774	0.00885735	1093	1093
ABCA3	0.0759418	0.0120243	0.0193415	1093	1093
ABCA4	-0.101584	0.000770206	0.0014838	1093	1088
ABCA5	-0.053868	0.0750496	0.104007	1093	1093
ABCA6	-0.055871	0.0648263	0.0913198	1093	1091
ABCA7	-0.295495	1.83152e-23	3.3589e-22	1093	1093
ABCA8	-0.101433	0.000784374	0.00150821	1093	1068
ABCA9	-0.0832271	0.00590228	0.0100009	1093	1089
ABCB10	0.142647	2.19251e-06	5.80303e-06	1093	1093
ABCB11	0.00450266	0.881798	0.905104	1093	713
ABCB1	-0.0721805	0.0169999	0.0265917	1093	1092
ABCB4	0.0422634	0.162631	0.208899	1093	1092
ABCB5	-0.0952744	0.00161384	0.00297049	1093	944
ABCB6	0.0779197	0.00996507	0.0162576	1093	1093
ABCB7	0.129805	1.67184e-05	3.99099e-05	1093	1093
ABCB8	-0.111274	0.000227794	0.000470216	1093	1093
ABCB9	0.0705992	0.0195805	0.030285	1093	1093
ABCC10	-0.182917	1.11579e-09	4.24236e-09	1093	1093
ABCC11	0.241165	6.29124e-16	4.7544e-15	1093	1085
ABCC12	0.179487	2.2904e-09	8.43777e-09	1093	810
ABCC13	0.0839016	0.00551079	0.0093825	1093	771
ABCC1	0.0347555	0.25094	0.308773	1093	1093
ABCC2	0.113853	0.000161933	0.000341325	1093	1087
ABCC3	-0.0534097	0.0775647	0.107165	1093	1093
ABCC4	0.0399734	0.186649	0.236658	1093	1093
ABCC5	0.0923908	0.00223164	0.00402241	1093	1093
ABCC6P1	0.125726	3.06809e-05	7.1151e-05	1093	834
ABCC6P2	0.117553	9.80182e-05	0.000212152	1093	1083
ABCC6	0.0677001	0.0252073	0.0382455	1093	1092
ABCC8	0.0548933	0.0696633	0.0973963	1093	1003
ABCC9	0.0706081	0.0195651	0.0302635	1093	1093
ABCD1	-0.140467	3.13575e-06	8.13607e-06	1093	1093
ABCD2	-0.125236	3.29577e-05	7.60984e-05	1093	1071
ABCD3	0.160985	8.74153e-08	2.70099e-07	1093	1093
ABCD4	-0.189093	2.95137e-10	1.19352e-09	1093	1093
ABCE1	0.360028	8.61072e-35	6.67496e-33	1093	1093
ABCF1	-0.00690116	0.819726	0.852506	1093	1093
ABCF2	0.0200884	0.507048	0.56943	1093	1093
ABCF3	-0.131635	1.26558e-05	3.06252e-05	1093	1093
ABCG1	0.169217	1.81641e-08	6.07027e-08	1093	1093
ABCG2	-0.0493136	0.103216	0.138873	1093	1093
ABCG4	-0.113979	0.000159229	0.000335943	1093	1068
ABCG5	-0.0412563	0.172891	0.220951	1093	1001
ABCG8	-0.000198058	0.994782	0.995325	1093	503
ABHD10	0.104395	0.000546493	0.00107229	1093	1093
ABHD11	0.119048	7.96947e-05	0.00017444	1093	1093
ABHD12B	0.00549187	0.856087	0.883393	1093	970
ABHD12	-0.0572204	0.0586078	0.0833914	1093	1093
ABHD13	0.071483	0.0180989	0.0281664	1093	1093
ABHD14A	-0.177299	3.59772e-09	1.29509e-08	1093	1093
ABHD14B	-0.0993799	0.00100208	0.00190053	1093	1093
ABHD15	0.0715768	0.0179477	0.0279527	1093	1093
ABHD1	-0.0521222	0.0849992	0.116336	1093	1092
ABHD2	0.157795	1.57392e-07	4.74246e-07	1093	1093
ABHD3	0.0434959	0.150709	0.194876	1093	1093
ABHD4	0.100187	0.000910524	0.00173751	1093	1093
ABHD5	0.248941	6.68141e-17	5.6227e-16	1093	1093
ABHD6	0.0374075	0.216559	0.270649	1093	1093
ABHD8	-0.361726	3.97476e-35	3.21732e-33	1093	1093
ABI1	0.082335	0.00645843	0.0108783	1093	1093
ABI2	-0.0510444	0.091656	0.124584	1093	1093
ABI3BP	-0.106194	0.000436837	0.000868204	1093	1093
ABI3	-0.305026	5.74074e-25	1.25493e-23	1093	1093
ABL1	0.0449364	0.137631	0.179679	1093	1093
ABL2	0.0794618	0.00858376	0.0141587	1093	1093
ABLIM1	0.0691063	0.022324	0.0341744	1093	1093
ABLIM2	-0.193338	1.15252e-10	4.87901e-10	1093	1093
ABLIM3	0.0167372	0.580437	0.639903	1093	1093
ABO	-0.0821658	0.00656905	0.0110452	1093	1033
ABP1	-0.0740024	0.0144005	0.0228141	1093	1071
ABRA	-0.0838515	0.00553905	0.00942424	1093	572
ABR	-0.149042	7.44271e-07	2.0725e-06	1093	1093
ABT1	-0.112776	0.000186894	0.000390631	1093	1093
ABTB1	-0.431285	9.77585e-51	5.97067e-48	1093	1093
ABTB2	-0.0595092	0.0491947	0.0709597	1093	1093
ACAA1	-0.163822	5.13165e-08	1.62931e-07	1093	1093
ACAA2	-0.0650352	0.0315618	0.0470571	1093	1093
ACACA	0.31438	1.68926e-26	4.40452e-25	1093	1093
ACACB	-0.161053	8.6326e-08	2.6702e-07	1093	1093
ACAD10	-0.0157204	0.603646	0.661834	1093	1093
ACAD11	-0.155728	2.28958e-07	6.77727e-07	1093	1093
ACAD8	-0.0088751	0.769457	0.810473	1093	1093
ACAD9	-0.151265	5.05724e-07	1.43501e-06	1093	1093
ACADL	-0.0686101	0.0233068	0.035579	1093	934
ACADM	0.10147	0.000780825	0.0015021	1093	1093
ACADSB	0.169589	1.68859e-08	5.67131e-08	1093	1093
ACADS	-0.246976	1.18608e-16	9.73346e-16	1093	1093
ACADVL	-0.326489	1.45421e-28	4.87679e-27	1093	1093
ACAN	-0.117131	0.000103873	0.000224246	1093	1093
ACAP1	-0.26147	1.52541e-18	1.55041e-17	1093	1093
ACAP2	0.179647	2.21538e-09	8.17485e-09	1093	1093
ACAP3	-0.243194	3.5309e-16	2.73397e-15	1093	1093
ACAT1	0.124055	3.91374e-05	8.94143e-05	1093	1093
ACAT2	0.067801	0.0249902	0.037952	1093	1093
ACBD3	0.24435	2.53462e-16	2.00256e-15	1093	1093
ACBD4	-0.260962	1.78519e-18	1.79812e-17	1093	1093
ACBD5	0.229276	1.67033e-14	1.0804e-13	1093	1093
ACBD6	-0.165118	4.01064e-08	1.29087e-07	1093	1093
ACBD7	-0.00758323	0.802261	0.837628	1093	1091
ACCN1	-0.0571832	0.0587726	0.0836083	1093	894
ACCN2	0.0399844	0.186528	0.236519	1093	1093
ACCN3	-0.189465	2.72046e-10	1.10368e-09	1093	1092
ACCN4	-0.238317	1.40305e-15	1.02607e-14	1093	964
ACCN5	0.116148	0.000118821	0.000254445	1093	151
ACCSL	-0.07517	0.0129248	0.0206827	1093	91
ACCS	-0.30354	9.93395e-25	2.11201e-23	1093	1093
ACD	-0.320314	1.68855e-27	4.96103e-26	1093	1093
ACE2	-0.0329335	0.276661	0.336295	1093	989
ACER1	0.00654797	0.828805	0.860395	1093	739
ACER2	0.244187	2.6566e-16	2.08992e-15	1093	1092
ACER3	0.185233	6.81341e-10	2.65412e-09	1093	1093
ACE	-0.0717576	0.017659	0.0275499	1093	1093
ACHE	-0.175584	5.10488e-09	1.80888e-08	1093	1091
ACIN1	-0.0866759	0.00413505	0.00717598	1093	1093
ACLY	0.314574	1.5683e-26	4.11041e-25	1093	1093
ACMSD	-0.0410697	0.174843	0.223177	1093	681
ACN9	-0.0176855	0.559173	0.619715	1093	1093
ACO1	-0.0704991	0.0197547	0.0305311	1093	1093
ACO2	-0.0123597	0.683152	0.733717	1093	1093
ACOT11	-0.160743	9.14482e-08	2.82214e-07	1093	1093
ACOT12	-0.0441872	0.144319	0.187492	1093	285
ACOT13	0.164872	4.20368e-08	1.34999e-07	1093	1093
ACOT1	0.0763161	0.0116078	0.0187165	1093	1093
ACOT2	0.100855	0.000840778	0.00161037	1093	1093
ACOT4	0.219165	2.35938e-13	1.33953e-12	1093	1093
ACOT6	0.176717	4.05236e-09	1.45123e-08	1093	1028
ACOT7	-0.0318419	0.292904	0.353269	1093	1093
ACOT8	-0.110824	0.000241592	0.000496714	1093	1093
ACOT9	-0.00862265	0.775837	0.815914	1093	1093
ACOX1	0.244924	2.14904e-16	1.70863e-15	1093	1093
ACOX2	0.066236	0.0285462	0.0428756	1093	1093
ACOX3	-0.00514014	0.865213	0.891669	1093	1093
ACOXL	-0.0230298	0.446891	0.510692	1093	1006
ACP1	0.151009	5.28953e-07	1.49797e-06	1093	1093
ACP2	-0.0320495	0.289766	0.349841	1093	1093
ACP5	-0.120314	6.67473e-05	0.0001473	1093	1093
ACP6	-0.0885024	0.00340781	0.00598557	1093	1093
ACPL2	0.148905	7.6204e-07	2.11935e-06	1093	1093
ACPP	0.201654	1.71538e-11	7.98465e-11	1093	1092
ACPT	-0.106823	0.000403614	0.000806068	1093	326
ACRBP	-0.0675027	0.0256368	0.0388469	1093	1092
ACRC	-0.147982	8.93071e-07	2.46404e-06	1093	1093
ACRV1	-0.00308606	0.918828	0.935245	1093	894
ACR	-0.302162	1.64728e-24	3.41223e-23	1093	1028
ACSBG1	-0.0947014	0.00172239	0.00315131	1093	1082
ACSBG2	-0.0385283	0.203095	0.25539	1093	956
ACSF2	-0.0203371	0.501803	0.564262	1093	1093
ACSF3	-0.201178	1.91715e-11	8.88689e-11	1093	1093
ACSL1	0.100086	0.000921521	0.00175617	1093	1093
ACSL3	0.328114	7.55632e-29	2.62582e-27	1093	1093
ACSL4	-0.0852433	0.00480086	0.00825326	1093	1093
ACSL5	-0.0973593	0.00126976	0.00237534	1093	1093
ACSL6	-0.127757	2.2727e-05	5.35557e-05	1093	1081
ACSM1	0.0175901	0.561295	0.621622	1093	1089
ACSM2A	-0.0744666	0.0137968	0.021944	1093	324
ACSM2B	-0.0505452	0.0948782	0.128651	1093	199
ACSM3	-0.0321454	0.288324	0.348392	1093	1093
ACSM4	0.09662	0.00138317	0.00257152	1093	180
ACSM5	-0.112348	0.000197795	0.000411963	1093	1086
ACSS1	-0.017488	0.563571	0.623903	1093	1093
ACSS2	-0.0449548	0.137469	0.179507	1093	1093
ACSS3	0.168526	2.07882e-08	6.90941e-08	1093	1093
ACTA1	-0.0750347	0.0130887	0.0209167	1093	1082
ACTA2	-0.122027	5.23738e-05	0.000117432	1093	1093
ACTBL2	-0.0158573	0.600499	0.658988	1093	866
ACTB	-0.151279	5.04476e-07	1.43167e-06	1093	1093
ACTC1	-0.0793326	0.00869257	0.0143242	1093	942
ACTG1	-0.0899174	0.00292659	0.00519147	1093	1093
ACTG2	-0.222115	1.10392e-13	6.4943e-13	1093	1093
ACTL6A	0.162987	6.00888e-08	1.89203e-07	1093	1093
ACTL6B	-0.00765539	0.800419	0.836181	1093	120
ACTL7A	-0.0163001	0.590364	0.649213	1093	105
ACTL7B	-0.09757	0.00123905	0.00232254	1093	292
ACTL8	0.0852498	0.00479764	0.00824844	1093	870
ACTL9	-0.0462025	0.126874	0.166948	1093	38
ACTN1	-0.136385	6.04064e-06	1.51675e-05	1093	1093
ACTN2	0.00518629	0.864014	0.890616	1093	1024
ACTN3	-0.122641	4.79716e-05	0.000108114	1093	898
ACTN4	-0.228926	1.83462e-14	1.17986e-13	1093	1093
ACTR10	0.361651	4.11277e-35	3.30251e-33	1093	1093
ACTR1A	0.00256147	0.93259	0.946347	1093	1093
ACTR1B	-0.226636	3.37631e-14	2.11203e-13	1093	1093
ACTR2	0.283654	1.13138e-21	1.65239e-20	1093	1093
ACTR3B	-0.164757	4.29698e-08	1.37819e-07	1093	1093
ACTR3C	0.110213	0.000261575	0.000535287	1093	1093
ACTR3	0.142031	2.42699e-06	6.39173e-06	1093	1093
ACTR5	0.0878321	0.00365996	0.00640279	1093	1093
ACTR6	0.230817	1.10313e-14	7.3017e-14	1093	1093
ACTR8	0.0302359	0.31794	0.379603	1093	1093
ACTRT1	0.0448378	0.138497	0.180662	1093	83
ACTRT2	-0.0107031	0.723748	0.770176	1093	10
ACVR1B	0.20375	1.04743e-11	4.99075e-11	1093	1093
ACVR1C	-0.0979828	0.00118085	0.00221975	1093	1088
ACVR1	0.0225439	0.45654	0.520215	1093	1093
ACVR2A	-0.00786322	0.795119	0.831724	1093	1093
ACVR2B	0.155659	2.31794e-07	6.85721e-07	1093	1093
ACVRL1	-0.255214	1.03329e-17	9.53137e-17	1093	1093
ACY1	0.000634839	0.983274	0.98621	1093	1093
ACY3	-0.0781623	0.00973543	0.0159138	1093	1020
ACYP1	-0.116876	0.000107578	0.000231848	1093	1093
ACYP2	-0.223974	6.80448e-14	4.09386e-13	1093	1093
ADAD1	-0.00353265	0.907131	0.925499	1093	62
ADAD2	-0.23563	2.96147e-15	2.09286e-14	1093	827
ADAL	0.118839	8.20411e-05	0.000179245	1093	1093
ADAM10	0.222781	9.28671e-14	5.50349e-13	1093	1093
ADAM11	-0.268463	1.69031e-19	1.91073e-18	1093	1091
ADAM12	0.0378791	0.210818	0.264145	1093	1093
ADAM15	-0.0590497	0.0509758	0.0733084	1093	1093
ADAM17	0.126309	2.8161e-05	6.56167e-05	1093	1093
ADAM18	0.0825133	0.00634365	0.0106975	1093	134
ADAM19	-0.0430771	0.154683	0.199682	1093	1093
ADAM20	0.00872692	0.7732	0.813608	1093	980
ADAM21P1	0.135438	7.01488e-06	1.75025e-05	1093	911
ADAM21	0.0936747	0.00193382	0.00351199	1093	1078
ADAM22	0.107355	0.000377371	0.000756582	1093	1085
ADAM23	-0.0235819	0.436071	0.500171	1093	1083
ADAM28	-0.134389	8.26748e-06	2.04832e-05	1093	1092
ADAM29	-0.0524158	0.0832551	0.114189	1093	689
ADAM2	0.165307	3.86841e-08	1.24709e-07	1093	197
ADAM30	0.0292305	0.334307	0.397004	1093	102
ADAM32	0.0269391	0.373593	0.43737	1093	1074
ADAM33	-0.231297	9.68639e-15	6.45599e-14	1093	1090
ADAM3A	0.013524	0.65515	0.708551	1093	29
ADAM5P	0.0393088	0.194086	0.245254	1093	57
ADAM6	-0.110296	0.000258777	0.000529776	1093	1093
ADAM7	0.0704523	0.0198367	0.0306484	1093	37
ADAM8	-0.100273	0.000901237	0.00172044	1093	1093
ADAM9	0.23162	8.87496e-15	5.94071e-14	1093	1093
ADAMDEC1	0.00749558	0.8045	0.839555	1093	1090
ADAMTS10	-0.358081	2.07843e-34	1.5123e-32	1093	1093
ADAMTS12	0.15596	2.19561e-07	6.51156e-07	1093	1093
ADAMTS13	-0.233218	5.74493e-15	3.92639e-14	1093	1093
ADAMTS14	-0.102715	0.000671616	0.00130296	1093	1093
ADAMTS15	0.111318	0.000226479	0.000467596	1093	1088
ADAMTS16	-0.0649968	0.0316626	0.0472011	1093	1089
ADAMTS17	0.0426854	0.158471	0.204024	1093	1093
ADAMTS18	-0.120787	6.24414e-05	0.000138495	1093	1069
ADAMTS19	0.0783977	0.00951717	0.0155773	1093	955
ADAMTS1	-0.164288	4.69726e-08	1.49918e-07	1093	1093
ADAMTS20	0.0366164	0.226441	0.281741	1093	544
ADAMTS2	-0.00190294	0.949894	0.960026	1093	1093
ADAMTS3	-0.130908	1.41429e-05	3.40602e-05	1093	1093
ADAMTS4	-0.108227	0.000337737	0.000681322	1093	1093
ADAMTS5	-0.028208	0.351497	0.414609	1093	1093
ADAMTS6	0.00486641	0.872327	0.897349	1093	1093
ADAMTS7	-0.190809	2.02356e-10	8.32684e-10	1093	1093
ADAMTS8	-0.0948722	0.00168934	0.00309786	1093	1086
ADAMTS9	-0.153762	3.25481e-07	9.45917e-07	1093	1093
ADAMTSL1	-0.0614423	0.042264	0.0616912	1093	1093
ADAMTSL2	-0.179322	2.37028e-09	8.71292e-09	1093	1093
ADAMTSL3	0.0985948	0.0010992	0.00207534	1093	1092
ADAMTSL4	-0.237937	1.56024e-15	1.13608e-14	1093	1093
ADAMTSL5	-0.0616534	0.0415598	0.0607336	1093	1092
ADAP1	-0.161423	8.05718e-08	2.50258e-07	1093	1093
ADAP2	-0.0660241	0.0290596	0.0436013	1093	1093
ADARB1	-0.141758	2.53869e-06	6.67196e-06	1093	1093
ADARB2	-0.0665553	0.0277873	0.0418511	1093	854
ADAR	0.101315	0.000795537	0.00152836	1093	1093
ADAT1	0.200055	2.49042e-11	1.14026e-10	1093	1093
ADAT2	-0.0556942	0.0656799	0.0923781	1093	1093
ADAT3	-0.245059	2.06701e-16	1.64666e-15	1093	1093
ADA	-0.191885	1.59394e-10	6.6527e-10	1093	1093
ADCK1	0.0547064	0.0706207	0.0985433	1093	1093
ADCK2	-0.0601127	0.0469354	0.0679245	1093	1093
ADCK4	-0.231227	9.87347e-15	6.56548e-14	1093	1093
ADCK5	-0.231614	8.88981e-15	5.94867e-14	1093	1093
ADCY10	0.143862	1.79195e-06	4.78876e-06	1093	1014
ADCY1	0.00667283	0.825593	0.857634	1093	1093
ADCY2	-0.0779573	0.00992916	0.0162003	1093	1090
ADCY3	-0.289276	1.63685e-22	2.64136e-21	1093	1093
ADCY4	-0.243967	2.82959e-16	2.21735e-15	1093	1093
ADCY5	-0.00898431	0.766701	0.808136	1093	1085
ADCY6	0.068905	0.0227183	0.0347464	1093	1093
ADCY7	-0.113227	0.000176029	0.000369224	1093	1093
ADCY8	-0.0713403	0.0183313	0.0284841	1093	466
ADCY9	0.0525037	0.0827386	0.113573	1093	1093
ADCYAP1R1	-0.0940655	0.00185069	0.00337074	1093	860
ADCYAP1	-0.16633	3.17969e-08	1.03533e-07	1093	1023
ADC	-0.375893	5.21586e-38	5.87294e-36	1093	1093
ADD1	-0.0559985	0.0642163	0.0905343	1093	1093
ADD2	-0.190279	2.27439e-10	9.30203e-10	1093	1092
ADD3	0.0493164	0.103196	0.138864	1093	1093
ADH1A	-0.14575	1.30534e-06	3.53917e-06	1093	784
ADH1B	-0.109159	0.00029971	0.000608692	1093	1029
ADH1C	0.00074891	0.980269	0.984072	1093	976
ADH4	-0.168934	1.91948e-08	6.39774e-08	1093	556
ADH5	0.053102	0.0792918	0.109281	1093	1093
ADH6	-0.00658682	0.827805	0.859446	1093	653
ADH7	0.053854	0.0751254	0.104094	1093	170
ADHFE1	-0.180098	2.01695e-09	7.4796e-09	1093	1093
ADI1	-0.0969234	0.00133555	0.00248918	1093	1093
ADIG	-0.104873	0.000515137	0.00101353	1093	105
ADIPOQ	-0.0854114	0.00471802	0.00812194	1093	1033
ADIPOR1	0.206825	5.03022e-12	2.48247e-11	1093	1093
ADIPOR2	0.174069	6.93378e-09	2.42243e-08	1093	1093
ADK	0.108465	0.000327647	0.000662359	1093	1093
ADM2	0.0302739	0.317333	0.37899	1093	1093
ADM	-0.134785	7.77085e-06	1.93026e-05	1093	1093
ADNP2	0.25061	4.08666e-17	3.51844e-16	1093	1093
ADNP	0.287234	3.31983e-22	5.15494e-21	1093	1093
ADORA1	-0.149681	6.66432e-07	1.86555e-06	1093	1093
ADORA2A	-0.0751327	0.0129697	0.0207497	1093	1093
ADORA2B	-0.104692	0.000526833	0.00103523	1093	1093
ADORA3	0.0713483	0.0183182	0.0284659	1093	1093
ADO	0.152214	4.28132e-07	1.22554e-06	1093	1093
ADPGK	-0.138495	4.31425e-06	1.10263e-05	1093	1093
ADPRHL1	-0.0151884	0.615956	0.672987	1093	1093
ADPRHL2	-0.225774	4.24054e-14	2.62817e-13	1093	1093
ADPRH	-0.152893	3.79747e-07	1.09324e-06	1093	1093
ADRA1A	-0.143907	1.77844e-06	4.75455e-06	1093	862
ADRA1B	-0.114579	0.000146929	0.000311196	1093	1087
ADRA1D	-0.11036	0.000256631	0.000525651	1093	1060
ADRA2A	-0.0381747	0.207276	0.260111	1093	1093
ADRA2B	-0.285772	5.48968e-22	8.33166e-21	1093	1091
ADRA2C	-0.0359891	0.234501	0.290853	1093	1090
ADRB1	-0.161028	8.67176e-08	2.68149e-07	1093	1038
ADRB2	-0.0722459	0.0168998	0.0264577	1093	1092
ADRB3	-0.183872	9.11207e-10	3.50084e-09	1093	697
ADRBK1	-0.203881	1.0155e-11	4.84436e-11	1093	1093
ADRBK2	0.0241201	0.425668	0.490023	1093	1093
ADRM1	-0.159903	1.06857e-07	3.27709e-07	1093	1093
ADSL	0.046092	0.127786	0.168023	1093	1093
ADSSL1	0.0667002	0.0274487	0.0413784	1093	1093
ADSS	0.167426	2.57356e-08	8.47273e-08	1093	1093
AEBP1	-0.0605259	0.0454392	0.065958	1093	1093
AEBP2	0.056529	0.0617291	0.0873211	1093	1093
AEN	-0.075038	0.0130847	0.020912	1093	1093
AES	-0.313955	1.98873e-26	5.11261e-25	1093	1093
AFAP1L1	-0.14961	6.74623e-07	1.88769e-06	1093	1093
AFAP1L2	-0.0682967	0.0239469	0.0364705	1093	1093
AFAP1	0.0166229	0.583025	0.64244	1093	1093
AFARP1	-0.0449742	0.137299	0.17932	1093	1055
AFF1	0.185897	5.90727e-10	2.31501e-09	1093	1093
AFF2	-0.121659	5.51897e-05	0.000123252	1093	1089
AFF3	0.118734	8.32533e-05	0.000181677	1093	1093
AFF4	0.260497	2.06151e-18	2.05896e-17	1093	1093
AFG3L1	-0.170835	1.32155e-08	4.48264e-08	1093	1093
AFG3L2	0.103716	0.000594164	0.00116074	1093	1093
AFMID	0.0110478	0.71523	0.762562	1093	1093
AFM	-0.0281287	0.352852	0.416037	1093	80
AFP	0.00234251	0.93834	0.951129	1093	797
AFTPH	0.255162	1.04952e-17	9.67219e-17	1093	1093
AG2	-0.266377	3.28127e-19	3.58644e-18	1093	1093
AGAP11	0.0255993	0.397832	0.462177	1093	1092
AGAP1	0.0962636	0.00144111	0.00267159	1093	1093
AGAP2	-0.19425	9.39111e-11	4.01779e-10	1093	1093
AGAP3	-0.326954	1.20617e-28	4.0721e-27	1093	1093
AGAP4	-0.270141	9.87528e-20	1.14917e-18	1093	1093
AGAP5	-0.0731249	0.0156052	0.0245739	1093	1093
AGAP6	-0.261144	1.68773e-18	1.70764e-17	1093	1093
AGAP7	-0.171385	1.1853e-08	4.03815e-08	1093	1091
AGAP8	-0.147707	9.36108e-07	2.57574e-06	1093	1093
AGA	0.0875559	0.00376872	0.00658106	1093	1093
AGBL1	-0.0296871	0.326807	0.389038	1093	216
AGBL2	-0.0738902	0.0145498	0.023034	1093	1089
AGBL3	-0.0796308	0.00844331	0.0139522	1093	1076
AGBL4	-0.0343664	0.256289	0.314673	1093	1050
AGBL5	-0.169455	1.73369e-08	5.81309e-08	1093	1093
AGER	-0.345571	5.16595e-32	2.62929e-30	1093	1093
AGFG1	0.1489	7.62686e-07	2.12085e-06	1093	1093
AGFG2	-0.229997	1.37614e-14	8.99942e-14	1093	1093
AGGF1	0.336345	2.57732e-30	1.07548e-28	1093	1093
AGK	0.0893031	0.00312732	0.00552131	1093	1093
AGL	0.280503	3.27982e-21	4.54328e-20	1093	1093
AGMAT	0.0765898	0.0113115	0.0182665	1093	1092
AGPAT1	-0.131661	1.26072e-05	3.05187e-05	1093	1093
AGPAT2	-0.283411	1.22874e-21	1.78553e-20	1093	1093
AGPAT3	0.139746	3.5255e-06	9.09813e-06	1093	1093
AGPAT4	-0.246615	1.3174e-16	1.07455e-15	1093	1093
AGPAT5	0.0555386	0.0664385	0.0932953	1093	1093
AGPAT6	-0.00741585	0.806538	0.841222	1093	1093
AGPAT9	-0.149198	7.24538e-07	2.02034e-06	1093	1093
AGPHD1	0.0762921	0.0116342	0.0187544	1093	1093
AGPS	0.0775778	0.0102969	0.0167636	1093	1093
AGR2	0.248055	8.66122e-17	7.19863e-16	1093	1089
AGR3	0.138327	4.43198e-06	1.13014e-05	1093	1028
AGRN	-0.324628	3.06349e-28	9.87916e-27	1093	1093
AGRP	-0.0411254	0.174259	0.222529	1093	643
AGTPBP1	0.0501913	0.0972169	0.131486	1093	1093
AGTR1	-0.0489536	0.105759	0.141973	1093	1090
AGTR2	-0.102716	0.000671515	0.00130289	1093	297
AGTRAP	-0.206454	5.49911e-12	2.70065e-11	1093	1093
AGT	-0.130847	1.42743e-05	3.43563e-05	1093	1092
AGXT2L1	-0.058926	0.0514639	0.0739437	1093	760
AGXT2L2	-0.294107	2.99976e-23	5.33654e-22	1093	1093
AGXT2	-0.0416446	0.168879	0.216276	1093	406
AGXT	-0.0159992	0.597241	0.65581	1093	452
AHCTF1	0.222848	9.12634e-14	5.41482e-13	1093	1093
AHCYL1	0.162103	7.09478e-08	2.21629e-07	1093	1093
AHCYL2	0.179623	2.2269e-09	8.21433e-09	1093	1093
AHCY	0.231624	8.86498e-15	5.936e-14	1093	1093
AHDC1	-0.354315	1.1224e-33	7.32103e-32	1093	1093
AHI1	0.0497101	0.10047	0.135505	1093	1093
AHNAK2	-0.0602919	0.0462816	0.0670359	1093	1093
AHNAK	0.109203	0.000298021	0.000605505	1093	1093
AHRR	-0.0292717	0.333624	0.39631	1093	1093
AHR	0.0286837	0.34343	0.406259	1093	1093
AHSA1	0.197928	4.06916e-11	1.81326e-10	1093	1093
AHSA2	-0.313955	1.98805e-26	5.11261e-25	1093	1093
AHSG	-0.0984785	0.0011143	0.0021019	1093	242
AHSP	-0.118314	8.82453e-05	0.000191906	1093	352
AICDA	-0.120274	6.71257e-05	0.00014807	1093	726
AIDA	-0.000699668	0.981567	0.98509	1093	1093
AIF1L	-0.0264722	0.381935	0.445996	1093	1093
AIF1	-0.227365	2.78198e-14	1.75441e-13	1093	1093
AIFM1	0.220428	1.70691e-13	9.83491e-13	1093	1093
AIFM2	-0.247259	1.09228e-16	8.99305e-16	1093	1093
AIFM3	-0.0900942	0.00287103	0.00510054	1093	1092
AIG1	0.105865	0.000455223	0.000902432	1093	1093
AIM1L	-0.0843982	0.00523768	0.0089509	1093	1086
AIM1	0.0874058	0.00382904	0.00668002	1093	1093
AIM2	-0.0928941	0.00211021	0.00381481	1093	1091
AIMP1	0.19447	8.93627e-11	3.83295e-10	1093	1093
AIMP2	0.0792006	0.00880494	0.0144951	1093	1093
AIPL1	-0.0553927	0.0671567	0.0941989	1093	301
AIP	-0.258567	3.72982e-18	3.61652e-17	1093	1093
AIRE	-0.185758	6.0872e-10	2.38136e-09	1093	377
AJAP1	-0.0857026	0.00457751	0.00789422	1093	1078
AK1	-0.228668	1.96543e-14	1.26116e-13	1093	1093
AK2	-0.122814	4.67952e-05	0.000105723	1093	1093
AK3L1	0.185814	6.01385e-10	2.35449e-09	1093	1093
AK3	-0.0833642	0.00582071	0.00986931	1093	1093
AK5	-0.176987	3.83484e-09	1.37578e-08	1093	1091
AK7	0.0985616	0.00110349	0.00208286	1093	1086
AKAP10	0.14813	8.70719e-07	2.406e-06	1093	1093
AKAP11	0.164085	4.88207e-08	1.55388e-07	1093	1093
AKAP12	-0.0163189	0.589936	0.648849	1093	1093
AKAP13	-0.0621699	0.0398782	0.0584372	1093	1093
AKAP14	0.0753097	0.0127575	0.0204394	1093	493
AKAP1	0.101221	0.00080464	0.00154541	1093	1093
AKAP2	0.00476871	0.874869	0.89955	1093	1083
AKAP3	-0.113635	0.000166733	0.000350857	1093	1091
AKAP4	0.00182778	0.95187	0.961462	1093	110
AKAP5	0.174087	6.90894e-09	2.4146e-08	1093	1093
AKAP6	0.0411475	0.174026	0.222275	1093	1093
AKAP7	-0.121736	5.45874e-05	0.000122004	1093	1093
AKAP8L	-0.285179	6.72499e-22	1.00625e-20	1093	1093
AKAP8	-0.212919	1.13644e-12	6.00078e-12	1093	1093
AKAP9	0.158704	1.33269e-07	4.04646e-07	1093	1093
AKD1	0.108012	0.000347127	0.000699564	1093	1093
AKIRIN1	0.0530091	0.079819	0.109933	1093	1093
AKIRIN2	-0.0928154	0.0021288	0.00384668	1093	1093
AKNAD1	-0.0264566	0.382216	0.446273	1093	998
AKNA	-0.252507	2.32678e-17	2.06682e-16	1093	1093
AKR1A1	-0.0437949	0.147919	0.191687	1093	1093
AKR1B10	0.151068	5.23467e-07	1.48327e-06	1093	977
AKR1B15	-0.0292984	0.333184	0.395811	1093	915
AKR1B1	-0.206048	6.06108e-12	2.96148e-11	1093	1093
AKR1C1	-0.153365	3.49278e-07	1.01116e-06	1093	1092
AKR1C2	-0.109654	0.000281182	0.000572794	1093	1090
AKR1C3	-0.133019	1.02287e-05	2.50803e-05	1093	1093
AKR1C4	-0.0437201	0.148613	0.192488	1093	168
AKR1CL1	-0.085941	0.00446537	0.00771271	1093	305
AKR1D1	0.173453	7.84845e-09	2.72734e-08	1093	767
AKR1E2	-0.153718	3.28045e-07	9.527e-07	1093	1086
AKR7A2	-0.100836	0.000842613	0.00161357	1093	1093
AKR7A3	0.198706	3.40258e-11	1.53233e-10	1093	1093
AKR7L	0.0652069	0.0311145	0.0464494	1093	1093
AKT1S1	-0.136383	6.04247e-06	1.51701e-05	1093	1093
AKT1	0.114939	0.000139968	0.000296985	1093	1093
AKT2	-0.142024	2.42993e-06	6.39866e-06	1093	1093
AKT3	-0.0631322	0.036899	0.0544236	1093	1093
AKTIP	0.0888703	0.0032762	0.00576496	1093	1093
ALAD	-0.0483012	0.110496	0.147581	1093	1093
ALAS1	-0.103547	0.000606637	0.0011835	1093	1093
ALAS2	-0.0927433	0.00214595	0.00387559	1093	531
ALB	-0.0512642	0.090266	0.122893	1093	1057
ALCAM	0.227585	2.62434e-14	1.65915e-13	1093	1093
ALDH16A1	-0.193995	9.94596e-11	4.24525e-10	1093	1093
ALDH18A1	0.259605	2.71278e-18	2.66323e-17	1093	1093
ALDH1A1	-0.0302463	0.317774	0.379427	1093	1093
ALDH1A2	-0.124366	3.74123e-05	8.57746e-05	1093	1086
ALDH1A3	-0.0243859	0.420584	0.484725	1093	1093
ALDH1B1	0.0421161	0.164102	0.210627	1093	1093
ALDH1L1	-0.259156	3.1138e-18	3.03916e-17	1093	1066
ALDH1L2	0.0176747	0.559414	0.619901	1093	1093
ALDH2	-0.0907548	0.00267183	0.00476639	1093	1093
ALDH3A1	-0.178983	2.54264e-09	9.321e-09	1093	997
ALDH3A2	0.0303936	0.315421	0.376953	1093	1093
ALDH3B1	-0.141859	2.49684e-06	6.56968e-06	1093	1093
ALDH3B2	0.224968	5.24312e-14	3.20556e-13	1093	1092
ALDH4A1	0.14798	8.93441e-07	2.46473e-06	1093	1093
ALDH5A1	0.119398	7.58956e-05	0.000166541	1093	1093
ALDH6A1	0.290697	9.96944e-23	1.65378e-21	1093	1093
ALDH7A1	0.0595763	0.0489392	0.0706366	1093	1093
ALDH8A1	-0.028091	0.353498	0.416726	1093	1085
ALDH9A1	0.0248699	0.411418	0.475603	1093	1093
ALDOA	0.0741034	0.0142671	0.0226331	1093	1093
ALDOB	-0.0418587	0.166697	0.2137	1093	1005
ALDOC	-0.0393565	0.193546	0.244663	1093	1093
ALG10B	0.195793	6.62473e-11	2.88383e-10	1093	1093
ALG10	0.31523	1.21859e-26	3.24021e-25	1093	1093
ALG11	0.128502	2.03354e-05	4.81734e-05	1093	1092
ALG12	-0.0819487	0.00671352	0.0112693	1093	1093
ALG13	0.0938606	0.00189386	0.00344315	1093	1093
ALG14	0.0799922	0.00814975	0.0135059	1093	1093
ALG1L2	-0.0401687	0.184503	0.234261	1093	391
ALG1L	0.166194	3.26412e-08	1.0611e-07	1093	1082
ALG1	0.108277	0.000335593	0.000677472	1093	1093
ALG2	0.214231	8.20183e-13	4.38831e-12	1093	1093
ALG3	0.0551279	0.0684765	0.0959233	1093	1093
ALG5	0.103645	0.000599408	0.00117031	1093	1093
ALG6	0.194766	8.35977e-11	3.59486e-10	1093	1093
ALG8	0.219298	2.28069e-13	1.29778e-12	1093	1093
ALG9	0.119562	7.41721e-05	0.000162918	1093	1093
ALKBH1	0.225748	4.26879e-14	2.64161e-13	1093	1093
ALKBH2	-0.120685	6.33471e-05	0.00014038	1093	1093
ALKBH3	-0.116439	0.000114193	0.000245082	1093	1093
ALKBH4	-0.27013	9.9094e-20	1.15248e-18	1093	1093
ALKBH5	-0.125853	3.0111e-05	6.98938e-05	1093	1093
ALKBH6	-0.266006	3.68886e-19	3.99941e-18	1093	1093
ALKBH7	-0.260198	2.26012e-18	2.24066e-17	1093	1093
ALKBH8	0.0911343	0.00256319	0.00458314	1093	1093
ALK	-0.146042	1.24268e-06	3.37779e-06	1093	1015
ALLC	-0.063082	0.0370497	0.054634	1093	319
ALMS1P	-0.107681	0.000362084	0.000727525	1093	1054
ALMS1	0.129788	1.67617e-05	4.00085e-05	1093	1093
ALOX12B	0.0152066	0.615531	0.672632	1093	766
ALOX12P2	-0.0984371	0.00111973	0.00211134	1093	974
ALOX12	-0.204726	8.30952e-12	4.0057e-11	1093	1074
ALOX15B	0.123999	3.94534e-05	9.00954e-05	1093	1093
ALOX15	0.067121	0.0264854	0.0400279	1093	1054
ALOX5AP	-0.137483	5.07353e-06	1.2848e-05	1093	1093
ALOX5	-0.226748	3.27756e-14	2.0528e-13	1093	1093
ALOXE3	0.0417803	0.167494	0.214625	1093	1075
ALPI	0.00220825	0.941868	0.953697	1093	109
ALPK1	-0.172888	8.78833e-09	3.03875e-08	1093	1093
ALPK2	-0.0177635	0.557443	0.618001	1093	1090
ALPK3	0.017556	0.562056	0.622397	1093	1093
ALPL	-0.275648	1.64668e-20	2.11799e-19	1093	1093
ALPPL2	0.0117848	0.697143	0.745723	1093	172
ALPP	-0.056121	0.063635	0.0897752	1093	275
ALS2CL	-0.304199	7.79128e-25	1.66702e-23	1093	1093
ALS2CR11	-0.0453141	0.13435	0.175787	1093	1040
ALS2CR12	0.0571066	0.0591125	0.0840207	1093	999
ALS2CR4	-0.030595	0.312224	0.373487	1093	1093
ALS2CR8	-0.00743004	0.806175	0.840974	1093	1093
ALS2	0.167248	2.66398e-08	8.75755e-08	1093	1093
ALX1	-0.139964	3.40284e-06	8.7951e-06	1093	653
ALX3	-0.282775	1.52438e-21	2.19613e-20	1093	1090
ALX4	-0.168073	2.27036e-08	7.51257e-08	1093	892
AMAC1L2	-0.159764	1.09643e-07	3.36048e-07	1093	810
AMAC1L3	-0.025155	0.406077	0.4704	1093	583
AMAC1	-0.0866476	0.00414732	0.00719542	1093	179
AMACR	0.274679	2.26372e-20	2.85158e-19	1093	1093
AMBN	-0.089709	0.00299332	0.00529865	1093	125
AMBP	0.159914	1.0663e-07	3.27094e-07	1093	1036
AMBRA1	-0.0759987	0.0119601	0.0192536	1093	1093
AMD1	0.0999461	0.000937031	0.00178337	1093	1093
AMDHD1	-0.0230511	0.446471	0.510299	1093	1083
AMDHD2	-0.224312	6.22814e-14	3.77075e-13	1093	1093
AMELX	-0.0331014	0.27422	0.33377	1093	44
AMFR	0.075235	0.0128467	0.0205708	1093	1093
AMHR2	-0.0159717	0.597873	0.656396	1093	774
AMH	-0.143796	1.81171e-06	4.83706e-06	1093	1047
AMICA1	-0.202679	1.3487e-11	6.34968e-11	1093	1092
AMIGO1	-0.0338367	0.263696	0.322362	1093	1093
AMIGO2	0.0639582	0.0344948	0.0510757	1093	1093
AMIGO3	-0.131195	1.35378e-05	3.26538e-05	1093	1093
AMMECR1L	0.171004	1.27808e-08	4.33812e-08	1093	1093
AMMECR1	0.216227	4.97289e-13	2.72582e-12	1093	1093
AMN1	0.0257014	0.395953	0.460221	1093	1093
AMN	-0.218796	2.59228e-13	1.46392e-12	1093	848
AMOTL1	-0.0465249	0.124242	0.163784	1093	1093
AMOTL2	-0.214036	8.61014e-13	4.59458e-12	1093	1093
AMOT	-0.0259947	0.390582	0.454698	1093	1093
AMPD1	-0.0773443	0.0105291	0.0170933	1093	907
AMPD2	-0.299004	5.19579e-24	1.0118e-22	1093	1093
AMPD3	-0.0329677	0.276163	0.33577	1093	1093
AMPH	0.0152595	0.614304	0.671582	1093	1093
AMTN	-0.0336016	0.267029	0.326022	1093	518
AMT	-0.369476	1.09793e-36	1.10742e-34	1093	1093
AMY1A	-0.231784	8.49016e-15	5.69259e-14	1093	1010
AMY2A	-0.185272	6.75626e-10	2.63339e-09	1093	858
AMY2B	-0.262492	1.1106e-18	1.15026e-17	1093	1092
AMZ1	0.0425985	0.159322	0.205009	1093	1090
AMZ2P1	-0.0120912	0.689674	0.739342	1093	1093
AMZ2	0.158971	1.26887e-07	3.86081e-07	1093	1093
ANAPC10	0.152906	3.78893e-07	1.09125e-06	1093	1093
ANAPC11	-0.157636	1.62026e-07	4.87481e-07	1093	1093
ANAPC13	0.125847	3.01395e-05	6.99519e-05	1093	1093
ANAPC16	-0.0580604	0.054993	0.0786626	1093	1093
ANAPC1	0.227602	2.61206e-14	1.6519e-13	1093	1093
ANAPC2	-0.223719	7.27318e-14	4.36672e-13	1093	1093
ANAPC4	-0.0965053	0.00140158	0.00260382	1093	1093
ANAPC5	0.014353	0.635499	0.69082	1093	1093
ANAPC7	0.21181	1.49474e-12	7.79066e-12	1093	1093
ANGEL1	0.161199	8.40108e-08	2.60178e-07	1093	1093
ANGEL2	0.125331	3.25045e-05	7.51035e-05	1093	1093
ANGPT1	-0.118117	9.06827e-05	0.000197011	1093	1093
ANGPT2	0.0146349	0.628875	0.684652	1093	1093
ANGPT4	-0.163797	5.1565e-08	1.63642e-07	1093	839
ANGPTL1	-0.0952121	0.00162533	0.00298891	1093	1090
ANGPTL2	-0.0804912	0.00775948	0.0128951	1093	1093
ANGPTL3	-0.0512396	0.0904207	0.123062	1093	574
ANGPTL4	-0.273832	2.98559e-20	3.71219e-19	1093	1093
ANGPTL5	-0.164344	4.64823e-08	1.48463e-07	1093	756
ANGPTL6	-0.288446	2.18334e-22	3.48694e-21	1093	1071
ANGPTL7	-0.182745	1.1572e-09	4.38987e-09	1093	777
ANG	-0.0474333	0.117054	0.155264	1093	1093
ANK1	0.00738705	0.807274	0.841859	1093	1091
ANK2	-0.0909682	0.00261025	0.00466148	1093	1093
ANK3	0.129586	1.72808e-05	4.12086e-05	1093	1093
ANKAR	-0.117558	9.79493e-05	0.000212025	1093	1093
ANKDD1A	-0.341423	3.04495e-31	1.43726e-29	1093	1093
ANKFN1	0.0246179	0.416177	0.480332	1093	764
ANKFY1	0.0583463	0.0538057	0.0770593	1093	1093
ANKHD1-EIF4EBP3	0.140027	3.36822e-06	8.70898e-06	1093	1093
ANKHD1	0.193007	1.24122e-10	5.23692e-10	1093	1093
ANKH	-0.133815	9.04176e-06	2.23193e-05	1093	1093
ANKIB1	0.271395	6.58995e-20	7.80838e-19	1093	1093
ANKK1	-0.260402	2.12273e-18	2.11277e-17	1093	1078
ANKLE1	-0.215086	6.62299e-13	3.58449e-12	1093	1091
ANKLE2	-0.0204973	0.498438	0.561105	1093	1093
ANKMY1	-0.0868528	0.0040589	0.00705295	1093	1093
ANKMY2	0.0380681	0.208547	0.261609	1093	1093
ANKRA2	0.0937751	0.00191213	0.00347417	1093	1093
ANKRD10	-0.209771	2.46474e-12	1.25764e-11	1093	1093
ANKRD11	-0.270402	9.07916e-20	1.06266e-18	1093	1093
ANKRD12	0.120802	6.23095e-05	0.000138233	1093	1093
ANKRD13A	-0.0508998	0.0925806	0.125756	1093	1093
ANKRD13B	-0.127613	2.32186e-05	5.46248e-05	1093	1093
ANKRD13C	0.232608	6.78605e-15	4.60514e-14	1093	1093
ANKRD13D	-0.229745	1.47244e-14	9.57942e-14	1093	1093
ANKRD16	-0.185238	6.80556e-10	2.65158e-09	1093	1093
ANKRD17	0.293976	3.1429e-23	5.56637e-22	1093	1093
ANKRD19	-0.172067	1.03504e-08	3.55267e-08	1093	1093
ANKRD1	-0.0364641	0.228379	0.283854	1093	991
ANKRD20A3	-0.0778073	0.0100731	0.0164218	1093	1055
ANKRD20A4	0.0536819	0.0760631	0.105277	1093	683
ANKRD20B	-0.0100668	0.739555	0.784544	1093	1029
ANKRD22	0.168968	1.90679e-08	6.35963e-08	1093	1093
ANKRD23	-0.171652	1.12405e-08	3.83987e-08	1093	1093
ANKRD24	-0.293629	3.55342e-23	6.26041e-22	1093	1092
ANKRD26P1	-0.0566684	0.0610892	0.0864765	1093	449
ANKRD26	0.0822981	0.00648242	0.010916	1093	1093
ANKRD27	0.0858814	0.00449319	0.00775809	1093	1093
ANKRD28	0.15633	2.05379e-07	6.10622e-07	1093	1093
ANKRD29	-0.113023	0.000180864	0.000378814	1093	1093
ANKRD2	-0.189475	2.71455e-10	1.10173e-09	1093	974
ANKRD30A	0.0775517	0.0103226	0.0168013	1093	947
ANKRD30B	0.196315	5.88314e-11	2.57827e-10	1093	1005
ANKRD31	0.142143	2.38278e-06	6.28104e-06	1093	927
ANKRD32	0.345374	5.62192e-32	2.85415e-30	1093	1093
ANKRD33	-0.0879368	0.00361949	0.00633528	1093	393
ANKRD34A	-0.0213654	0.480421	0.543497	1093	1093
ANKRD34B	0.125337	3.24781e-05	7.50512e-05	1093	787
ANKRD34C	0.0226828	0.45377	0.51741	1093	597
ANKRD35	-0.361901	3.66994e-35	2.98256e-33	1093	1092
ANKRD36BP1	0.116777	0.000109036	0.000234689	1093	1092
ANKRD36B	0.0434016	0.151597	0.195999	1093	1091
ANKRD36	-0.141213	2.77607e-06	7.25232e-06	1093	1093
ANKRD37	-0.00924869	0.760044	0.802501	1093	1093
ANKRD39	-0.157407	1.68919e-07	5.06706e-07	1093	1093
ANKRD40	0.222003	1.13658e-13	6.67668e-13	1093	1093
ANKRD42	0.0523876	0.0834216	0.114394	1093	1093
ANKRD43	0.0442728	0.143542	0.186615	1093	1090
ANKRD44	-0.000700415	0.981547	0.98509	1093	1093
ANKRD45	-0.108296	0.0003348	0.000676073	1093	1078
ANKRD46	0.230582	1.17536e-14	7.74666e-14	1093	1093
ANKRD49	0.0223211	0.461004	0.524531	1093	1093
ANKRD50	0.269901	1.0666e-19	1.23406e-18	1093	1093
ANKRD52	0.172828	8.8935e-09	3.07195e-08	1093	1093
ANKRD53	-0.350202	6.8998e-33	4.10223e-31	1093	1081
ANKRD54	-0.099199	0.00102372	0.00194012	1093	1093
ANKRD55	-0.155605	2.34052e-07	6.9179e-07	1093	1008
ANKRD56	0.0389245	0.198485	0.250279	1093	1091
ANKRD57	0.0128702	0.670818	0.722549	1093	1093
ANKRD58	-0.219806	2.00246e-13	1.14528e-12	1093	1092
ANKRD5	0.310604	7.11923e-26	1.70819e-24	1093	1093
ANKRD6	-0.146682	1.11492e-06	3.04446e-06	1093	1093
ANKRD7	-0.102897	0.00065688	0.00127597	1093	725
ANKRD9	-0.201064	1.96904e-11	9.11273e-11	1093	1093
ANKS1A	0.0384963	0.203471	0.255815	1093	1093
ANKS1B	0.146214	1.20693e-06	3.28635e-06	1093	1093
ANKS3	-0.349497	9.39541e-33	5.48882e-31	1093	1093
ANKS4B	0.11548	0.000130096	0.000277205	1093	423
ANKS6	-0.109974	0.000269812	0.000551143	1093	1093
ANKZF1	-0.310384	7.73802e-26	1.85446e-24	1093	1093
ANLN	0.265547	4.26458e-19	4.60132e-18	1093	1093
ANO10	0.183928	9.00378e-10	3.46186e-09	1093	1093
ANO1	0.0237314	0.433166	0.497434	1093	1093
ANO2	-0.0692218	0.0221004	0.0338475	1093	1091
ANO3	0.0369369	0.222399	0.277293	1093	995
ANO4	-0.142043	2.42226e-06	6.38013e-06	1093	980
ANO5	0.074572	0.0136629	0.0217482	1093	1081
ANO6	0.111461	0.000222264	0.00045946	1093	1093
ANO7	0.00797947	0.792159	0.829401	1093	1093
ANO8	-0.172967	8.6503e-09	2.99257e-08	1093	1093
ANO9	-0.226686	3.33177e-14	2.08546e-13	1093	1093
ANP32A	0.040879	0.176856	0.22546	1093	1093
ANP32B	-0.0703957	0.0199363	0.0307953	1093	1093
ANP32C	-0.0771217	0.0107547	0.0174386	1093	1034
ANP32D	-0.0223324	0.460777	0.524302	1093	335
ANP32E	-0.13023	1.56764e-05	3.75362e-05	1093	1093
ANPEP	-0.130819	1.43353e-05	3.44947e-05	1093	1093
ANTXR1	0.0633647	0.0362084	0.0534637	1093	1093
ANTXR2	-0.0385426	0.202928	0.255211	1093	1093
ANTXRL	-0.14294	2.08875e-06	5.53932e-06	1093	496
ANUBL1	0.126556	2.71559e-05	6.34435e-05	1093	1093
ANXA10	0.048129	0.111773	0.149112	1093	395
ANXA11	-0.17995	2.0803e-09	7.70177e-09	1093	1093
ANXA13	-0.106407	0.000425329	0.000846667	1093	1028
ANXA1	-0.183222	1.04617e-09	3.99046e-09	1093	1093
ANXA2P1	-0.0274465	0.364656	0.42825	1093	1093
ANXA2P2	-0.0302518	0.317685	0.379344	1093	1093
ANXA2P3	-0.0802324	0.00795981	0.0132095	1093	1081
ANXA2	-0.0532163	0.0786465	0.108481	1093	1093
ANXA3	-0.0996357	0.000972193	0.00184697	1093	1093
ANXA4	0.00347481	0.908645	0.926433	1093	1093
ANXA5	-0.0409656	0.175939	0.224434	1093	1093
ANXA6	-0.0820043	0.0066763	0.0112125	1093	1093
ANXA7	0.165435	3.77507e-08	1.21875e-07	1093	1093
ANXA8L1	-0.0972333	0.00128847	0.00240722	1093	164
ANXA8L2	-0.200623	2.18199e-11	1.00429e-10	1093	1026
ANXA8	-0.220656	1.60944e-13	9.29996e-13	1093	1073
ANXA9	0.0717337	0.0176969	0.0275984	1093	1093
AOAH	-0.124715	3.55599e-05	8.18162e-05	1093	1093
AOC2	-0.137058	5.42826e-06	1.36912e-05	1093	1092
AOC3	-0.132144	1.17064e-05	2.8444e-05	1093	1093
AOX1	-0.0307456	0.309846	0.371061	1093	1093
AOX2P	-0.0142135	0.638789	0.693835	1093	535
AP1AR	0.19621	6.02657e-11	2.63941e-10	1093	1093
AP1B1	-0.0365737	0.226983	0.282345	1093	1093
AP1G1	0.277175	9.94819e-21	1.31999e-19	1093	1093
AP1G2	0.0664355	0.0280699	0.0422359	1093	1093
AP1M1	-0.247116	1.13896e-16	9.35441e-16	1093	1093
AP1M2	0.155278	2.48238e-07	7.31682e-07	1093	1093
AP1S1	-0.0842771	0.0053031	0.00905642	1093	1093
AP1S2	0.0118837	0.694728	0.743771	1093	1093
AP1S3	0.170355	1.45277e-08	4.90792e-08	1093	1093
AP2A1	-0.111556	0.000219513	0.00045396	1093	1093
AP2A2	-0.116713	0.000109996	0.000236628	1093	1093
AP2B1	0.183566	9.72438e-10	3.72401e-09	1093	1093
AP2M1	-0.157775	1.57955e-07	4.75871e-07	1093	1093
AP2S1	-0.077574	0.0103006	0.0167684	1093	1093
AP3B1	0.287743	2.78501e-22	4.38873e-21	1093	1093
AP3B2	-0.156415	2.02238e-07	6.01729e-07	1093	1076
AP3D1	-0.00159453	0.958006	0.96601	1093	1093
AP3M1	0.325668	2.02131e-28	6.65677e-27	1093	1093
AP3M2	0.113458	0.0001707	0.000358867	1093	1093
AP3S1	0.0987187	0.00108332	0.00204671	1093	1093
AP3S2	0.141366	2.70696e-06	7.0874e-06	1093	1093
AP4B1	-0.210192	2.22385e-12	1.14021e-11	1093	1093
AP4E1	0.231738	8.59523e-15	5.75921e-14	1093	1093
AP4M1	-0.16545	3.76428e-08	1.21546e-07	1093	1093
AP4S1	0.224217	6.38527e-14	3.86008e-13	1093	1093
APAF1	0.201905	1.6174e-11	7.55298e-11	1093	1093
APBA1	-0.140753	2.99263e-06	7.7888e-06	1093	1093
APBA2	-0.200947	2.02334e-11	9.35547e-11	1093	1093
APBA3	-0.389735	5.7515e-41	9.20012e-39	1093	1093
APBB1IP	-0.162059	7.15374e-08	2.23367e-07	1093	1093
APBB1	-0.277134	1.00824e-20	1.33515e-19	1093	1093
APBB2	0.0957574	0.00152725	0.00282195	1093	1093
APBB3	-0.285238	6.59191e-22	9.89278e-21	1093	1093
APC2	-0.0551799	0.0682157	0.0956044	1093	1091
APCDD1L	-0.171016	1.27505e-08	4.32928e-08	1093	1088
APCDD1	-0.211547	1.59495e-12	8.28513e-12	1093	1093
APCS	-0.0435175	0.150506	0.194664	1093	40
APC	0.289684	1.41984e-22	2.30409e-21	1093	1093
APEH	0.10364	0.000599731	0.00117071	1093	1093
APEX1	0.159886	1.07195e-07	3.28695e-07	1093	1093
APEX2	-0.0138808	0.646662	0.700687	1093	1093
APH1A	-0.114355	0.000151418	0.000320199	1093	1093
APH1B	-0.0422471	0.162794	0.209095	1093	1093
API5	0.283291	1.27962e-21	1.85545e-20	1093	1093
APIP	0.0947137	0.00171998	0.00314746	1093	1093
APITD1	-0.0207508	0.493141	0.556042	1093	1093
APLF	-0.165597	3.6601e-08	1.18429e-07	1093	1093
APLNR	-0.0979899	0.00117987	0.0022181	1093	1092
APLN	0.00203466	0.946431	0.9575	1093	1093
APLP1	-0.0896154	0.00302374	0.00534921	1093	1093
APLP2	0.0972195	0.00129052	0.00241061	1093	1093
APOA1BP	-0.104147	0.000563474	0.00110357	1093	1093
APOA1	-0.1583	1.43513e-07	4.34454e-07	1093	985
APOA2	-0.0725963	0.0163729	0.0257086	1093	188
APOA4	0.000143589	0.996217	0.996464	1093	37
APOA5	0.08159	0.00695846	0.0116485	1093	473
APOB48R	-0.22838	2.12269e-14	1.35552e-13	1093	1093
APOBEC1	0.0549059	0.0695992	0.0973269	1093	205
APOBEC2	-0.0351685	0.24535	0.302781	1093	995
APOBEC3A	-0.0684754	0.0235801	0.0359635	1093	1089
APOBEC3B	0.0535931	0.07655	0.105857	1093	1092
APOBEC3C	-0.209439	2.6722e-12	1.35834e-11	1093	1093
APOBEC3D	-0.212755	1.18361e-12	6.23512e-12	1093	1093
APOBEC3F	-0.240047	8.63062e-16	6.44499e-15	1093	1093
APOBEC3G	-0.174471	6.39516e-09	2.24203e-08	1093	1093
APOBEC3H	-0.132484	1.11092e-05	2.70973e-05	1093	1077
APOBEC4	0.0762934	0.0116327	0.0187536	1093	496
APOB	-0.0912514	0.00253049	0.00452667	1093	916
APOC1P1	-0.0421356	0.163907	0.210404	1093	492
APOC1	-0.00482076	0.873515	0.898341	1093	1093
APOC2	-0.038564	0.202677	0.254922	1093	1093
APOC3	-0.0516796	0.0876842	0.119677	1093	163
APOC4	-0.115854	0.000123657	0.000264212	1093	801
APOD	-0.00696128	0.818183	0.851139	1093	1093
APOE	-0.243285	3.44052e-16	2.67117e-15	1093	1093
APOF	0.184807	7.46398e-10	2.89579e-09	1093	880
APOH	-0.0347812	0.250589	0.308379	1093	73
APOL1	-0.114905	0.000140614	0.000298261	1093	1093
APOL2	-0.149017	7.47466e-07	2.08083e-06	1093	1093
APOL3	-0.122924	4.60642e-05	0.000104189	1093	1093
APOL4	0.00402253	0.894324	0.915304	1093	1092
APOL5	-0.117822	9.44511e-05	0.000204739	1093	540
APOL6	0.00952942	0.752994	0.796295	1093	1093
APOLD1	-0.130916	1.41264e-05	3.40245e-05	1093	1093
APOM	-0.234689	3.83863e-15	2.68358e-14	1093	1093
APOOL	0.32195	8.86833e-28	2.71231e-26	1093	1093
APOO	0.0561204	0.0636377	0.0897752	1093	1093
APPBP2	0.29297	4.48479e-23	7.79905e-22	1093	1093
APPL1	0.152577	4.01574e-07	1.15312e-06	1093	1093
APPL2	0.136786	5.66853e-06	1.42704e-05	1093	1093
APP	-0.142262	2.33639e-06	6.16521e-06	1093	1093
APRT	-0.124263	3.79736e-05	8.69429e-05	1093	1093
APTX	0.0579191	0.0555878	0.0794253	1093	1093
AQP10	-0.102445	0.000693981	0.00134402	1093	528
AQP11	0.132633	1.08579e-05	2.65258e-05	1093	1093
AQP12A	0.0484557	0.109359	0.14627	1093	43
AQP12B	0.0596891	0.0485121	0.0700703	1093	277
AQP1	-0.247138	1.13144e-16	9.3018e-16	1093	1093
AQP2	-0.0713092	0.0183822	0.0285566	1093	592
AQP3	0.0392443	0.19482	0.246104	1093	1093
AQP4	-0.0857876	0.00453726	0.00783016	1093	1029
AQP5	-0.18124	1.58878e-09	5.94648e-09	1093	1031
AQP6	-0.177027	3.80343e-09	1.36548e-08	1093	1015
AQP7P1	-0.234686	3.84095e-15	2.68427e-14	1093	930
AQP7P3	-0.222013	1.13367e-13	6.6635e-13	1093	527
AQP7	-0.157873	1.55157e-07	4.67793e-07	1093	1052
AQP8	-0.11678	0.00010899	0.000234638	1093	827
AQP9	0.0690185	0.0224953	0.0344262	1093	1086
AQPEP	-0.11267	0.000189531	0.000395896	1093	1052
AQR	0.337227	1.78357e-30	7.59999e-29	1093	1093
ARAF	-0.106958	0.000396792	0.000792993	1093	1093
ARAP1	-0.346693	3.18093e-32	1.68272e-30	1093	1093
ARAP2	-0.0210231	0.487483	0.550402	1093	1093
ARAP3	-0.279973	3.91764e-21	5.38242e-20	1093	1093
ARCN1	0.268486	1.67813e-19	1.89802e-18	1093	1093
ARC	-0.0477314	0.114768	0.152562	1093	1083
AREG	0.0387955	0.199978	0.251862	1093	1091
ARF1	-0.00561406	0.852921	0.880603	1093	1093
ARF3	0.247092	1.14694e-16	9.41616e-16	1093	1093
ARF4	0.170073	1.53558e-08	5.18072e-08	1093	1093
ARF5	-0.19814	3.87618e-11	1.73186e-10	1093	1093
ARF6	0.43698	3.47382e-52	2.50053e-49	1093	1093
ARFGAP1	-0.158584	1.36239e-07	4.13166e-07	1093	1093
ARFGAP2	-0.123738	4.09732e-05	9.34179e-05	1093	1093
ARFGAP3	0.0606234	0.0450921	0.0654872	1093	1093
ARFGEF1	0.323913	4.0727e-28	1.29677e-26	1093	1093
ARFGEF2	0.249452	5.74937e-17	4.87499e-16	1093	1093
ARFIP1	0.316491	7.49e-27	2.01819e-25	1093	1093
ARFIP2	0.188042	3.71291e-10	1.48657e-09	1093	1093
ARFRP1	-0.291489	7.55301e-23	1.27497e-21	1093	1093
ARG1	-0.101372	0.000790157	0.00151875	1093	530
ARG2	0.223404	7.89546e-14	4.72065e-13	1093	1093
ARGFXP2	-0.0287992	0.34149	0.404367	1093	833
ARGFX	-0.0424118	0.16116	0.207193	1093	75
ARGLU1	-0.239171	1.10443e-15	8.17175e-15	1093	1093
ARHGAP10	-0.0589644	0.0513121	0.07375	1093	1093
ARHGAP11A	0.284823	7.59474e-22	1.1247e-20	1093	1093
ARHGAP11B	0.21845	2.83153e-13	1.59323e-12	1093	1082
ARHGAP12	0.203222	1.18661e-11	5.6194e-11	1093	1093
ARHGAP15	-0.14532	1.40355e-06	3.79203e-06	1093	1093
ARHGAP17	-0.0792972	0.00872259	0.0143701	1093	1093
ARHGAP18	0.0759487	0.0120164	0.0193304	1093	1093
ARHGAP19	0.0109367	0.717971	0.764836	1093	1093
ARHGAP1	0.0349487	0.248315	0.305938	1093	1093
ARHGAP20	-0.0739997	0.014404	0.022818	1093	1093
ARHGAP21	-0.0567414	0.0607561	0.0860715	1093	1093
ARHGAP22	-0.400297	2.54539e-43	6.41278e-41	1093	1093
ARHGAP23	-0.199515	2.82228e-11	1.28462e-10	1093	1093
ARHGAP24	-0.066449	0.028038	0.042191	1093	1093
ARHGAP25	-0.188339	3.48027e-10	1.39647e-09	1093	1093
ARHGAP26	-0.022796	0.451521	0.515282	1093	1093
ARHGAP27	-0.221896	1.16838e-13	6.85151e-13	1093	1093
ARHGAP28	-0.0593281	0.0498905	0.0718964	1093	1093
ARHGAP29	0.0670918	0.0265513	0.0401245	1093	1093
ARHGAP30	-0.251389	3.24498e-17	2.83005e-16	1093	1093
ARHGAP31	-0.140558	3.08924e-06	8.02477e-06	1093	1093
ARHGAP32	0.291608	7.24534e-23	1.23024e-21	1093	1093
ARHGAP33	-0.26024	2.23152e-18	2.21558e-17	1093	1093
ARHGAP36	-0.130329	1.54441e-05	3.70301e-05	1093	685
ARHGAP39	-0.0214947	0.477768	0.5411	1093	1093
ARHGAP42	0.0764559	0.0114556	0.0184858	1093	1093
ARHGAP4	-0.363781	1.54949e-35	1.33462e-33	1093	1093
ARHGAP5	0.263774	7.4429e-19	7.8417e-18	1093	1093
ARHGAP6	-0.0314643	0.298667	0.359167	1093	1092
ARHGAP8	0.178393	2.87245e-09	1.04653e-08	1093	1092
ARHGAP9	-0.269549	1.19428e-19	1.37547e-18	1093	1093
ARHGDIA	-0.154157	3.03381e-07	8.8529e-07	1093	1093
ARHGDIB	-0.0998635	0.000946274	0.00180028	1093	1093
ARHGDIG	0.0245105	0.418214	0.482324	1093	890
ARHGEF10L	-0.394466	5.19867e-42	1.04779e-39	1093	1093
ARHGEF10	-0.189618	2.63044e-10	1.06888e-09	1093	1093
ARHGEF11	-0.0964256	0.00141451	0.0026259	1093	1093
ARHGEF12	0.20201	1.57823e-11	7.37861e-11	1093	1093
ARHGEF15	-0.214551	7.57128e-13	4.06714e-12	1093	1093
ARHGEF16	-0.0592901	0.0500372	0.0720975	1093	1093
ARHGEF17	-0.200347	2.32686e-11	1.06796e-10	1093	1093
ARHGEF18	-0.24601	1.56993e-16	1.27076e-15	1093	1093
ARHGEF19	-0.233621	5.14494e-15	3.53912e-14	1093	1093
ARHGEF1	-0.460851	1.43753e-58	1.93156e-55	1093	1093
ARHGEF2	-0.311145	5.80109e-26	1.41038e-24	1093	1093
ARHGEF33	-0.270255	9.51908e-20	1.10964e-18	1093	1092
ARHGEF35	0.0046649	0.877571	0.901685	1093	1093
ARHGEF37	0.0156623	0.604985	0.662941	1093	1093
ARHGEF38	0.188075	3.68646e-10	1.47686e-09	1093	1079
ARHGEF3	0.0183229	0.545098	0.60645	1093	1093
ARHGEF4	-0.234404	4.15067e-15	2.88571e-14	1093	1093
ARHGEF5	-0.11528	0.000133675	0.000284441	1093	1093
ARHGEF6	-0.0440791	0.145304	0.188638	1093	1093
ARHGEF7	-0.104218	0.000558562	0.00109437	1093	1093
ARHGEF9	-0.211187	1.74276e-12	9.03662e-12	1093	1093
ARID1A	0.0869428	0.00402064	0.00699069	1093	1093
ARID1B	0.0431938	0.153567	0.19842	1093	1093
ARID2	0.311568	4.94094e-26	1.21297e-24	1093	1093
ARID3A	0.0730487	0.0157138	0.0247372	1093	1093
ARID3B	-0.0631496	0.036847	0.0543549	1093	1093
ARID3C	-0.136671	5.77282e-06	1.45257e-05	1093	678
ARID4A	0.230418	1.22836e-14	8.08013e-14	1093	1093
ARID4B	0.137543	5.0247e-06	1.27339e-05	1093	1093
ARID5A	-0.449784	1.51399e-55	1.60691e-52	1093	1093
ARID5B	-0.054176	0.073397	0.101973	1093	1093
ARIH1	0.241019	6.5584e-16	4.94148e-15	1093	1093
ARIH2	-0.0512174	0.0905603	0.123219	1093	1093
ARL10	-0.0295583	0.328912	0.39122	1093	1091
ARL11	-0.0170491	0.573401	0.633116	1093	1093
ARL13A	-0.0806958	0.0076044	0.0126541	1093	678
ARL13B	0.113181	0.000177125	0.000371289	1093	1093
ARL14	-0.048578	0.108466	0.145201	1093	587
ARL15	0.118199	8.96596e-05	0.000194855	1093	1093
ARL16	-0.201717	1.69021e-11	7.87476e-11	1093	1093
ARL17A	0.0718624	0.0174936	0.0273067	1093	1093
ARL17B	0.000846493	0.977699	0.982263	1093	1024
ARL1	0.263868	7.22856e-19	7.63984e-18	1093	1093
ARL2BP	0.0436183	0.149562	0.193579	1093	1093
ARL2	-0.237197	1.9177e-15	1.38337e-14	1093	1093
ARL3	-0.0193606	0.522562	0.584475	1093	1093
ARL4A	0.0154293	0.610369	0.667885	1093	1093
ARL4C	-0.192818	1.29475e-10	5.45478e-10	1093	1093
ARL4D	-0.135702	6.72872e-06	1.68302e-05	1093	1093
ARL5A	0.194361	9.15802e-11	3.9264e-10	1093	1093
ARL5B	0.236893	2.08678e-15	1.4989e-14	1093	1093
ARL5C	-0.054388	0.0722771	0.100548	1093	430
ARL6IP1	0.299785	3.91539e-24	7.7672e-23	1093	1093
ARL6IP4	-0.319086	2.7317e-27	7.84293e-26	1093	1093
ARL6IP5	0.0487114	0.107499	0.14401	1093	1093
ARL6IP6	0.0252012	0.405215	0.469503	1093	1093
ARL6	0.100623	0.000864445	0.00165381	1093	1093
ARL8A	-0.148135	8.69927e-07	2.40414e-06	1093	1093
ARL8B	0.252523	2.31589e-17	2.05896e-16	1093	1093
ARL9	-0.0960365	0.00147919	0.0027384	1093	1074
ARMC10	0.0739672	0.0144471	0.0228827	1093	1093
ARMC1	0.319923	1.96826e-27	5.74098e-26	1093	1093
ARMC2	0.0202393	0.503863	0.566199	1093	1093
ARMC3	0.114409	0.000150317	0.000317972	1093	1029
ARMC4	0.00120295	0.968313	0.974404	1093	981
ARMC5	-0.307069	2.68626e-25	6.05611e-24	1093	1093
ARMC6	-0.116245	0.000117251	0.000251324	1093	1093
ARMC7	-0.0790547	0.00893072	0.0146842	1093	1093
ARMC8	0.163347	5.61433e-08	1.77167e-07	1093	1093
ARMC9	-0.0340821	0.260246	0.318802	1093	1093
ARMCX1	-0.154478	2.86495e-07	8.38072e-07	1093	1093
ARMCX2	-0.176444	4.2851e-09	1.52996e-08	1093	1093
ARMCX3	0.00108172	0.971504	0.977042	1093	1093
ARMCX5	0.0858935	0.00448749	0.00774891	1093	1093
ARMCX6	-0.242963	3.77249e-16	2.91049e-15	1093	1093
ARMS2	-0.0651439	0.0312781	0.0466798	1093	445
ARNT2	-0.00471561	0.876251	0.900696	1093	1093
ARNTL2	0.0147087	0.627146	0.683176	1093	1093
ARNTL	0.0197197	0.514877	0.577064	1093	1093
ARNT	-0.0492424	0.103715	0.139474	1093	1093
ARPC1A	-0.0172282	0.56938	0.629297	1093	1093
ARPC1B	-0.241491	5.7362e-16	4.35127e-15	1093	1093
ARPC2	-0.113355	0.000173069	0.000363506	1093	1093
ARPC3	0.122705	4.75367e-05	0.000107278	1093	1093
ARPC4	-0.163873	5.08258e-08	1.615e-07	1093	1093
ARPC5L	-0.0165483	0.584716	0.644022	1093	1093
ARPC5	-0.0716862	0.0177726	0.0277057	1093	1093
ARPM1	-0.091505	0.00246098	0.00441134	1093	1093
ARPP19	0.30009	3.50515e-24	7.01552e-23	1093	1093
ARPP21	-0.00564572	0.852101	0.879865	1093	644
ARR3	-0.0547732	0.0702775	0.0981325	1093	281
ARRB1	0.100169	0.000912529	0.00174101	1093	1093
ARRB2	-0.229468	1.58643e-14	1.02845e-13	1093	1093
ARRDC1	-0.00613004	0.839579	0.86934	1093	1093
ARRDC2	-0.391054	2.95378e-41	5.1322e-39	1093	1093
ARRDC3	0.00458917	0.879544	0.903205	1093	1093
ARRDC4	0.0132969	0.660575	0.713384	1093	1093
ARRDC5	-0.21909	2.40503e-13	1.36429e-12	1093	1021
ARSA	-0.268448	1.69841e-19	1.9188e-18	1093	1093
ARSB	0.0528789	0.0805632	0.110851	1093	1093
ARSD	0.122653	4.78861e-05	0.000107982	1093	1093
ARSE	-0.168887	1.93716e-08	6.45345e-08	1093	1091
ARSF	-0.145003	1.48041e-06	3.99219e-06	1093	585
ARSG	0.145643	1.32934e-06	3.59974e-06	1093	1093
ARSH	0.0888533	0.00328218	0.00577497	1093	1012
ARSI	-0.166036	3.36442e-08	1.09212e-07	1093	1091
ARSJ	-0.0561255	0.0636137	0.0897538	1093	1092
ARSK	0.0949851	0.00166782	0.00306175	1093	1093
ART1	0.121659	5.51897e-05	0.000123252	1093	512
ART3	-0.19328	1.16772e-10	4.9413e-10	1093	919
ART4	-0.077836	0.0100454	0.0163807	1093	879
ART5	-0.151026	5.27362e-07	1.49388e-06	1093	1062
ARTN	-0.137727	4.87895e-06	1.23817e-05	1093	1090
ARV1	0.0417513	0.16779	0.214949	1093	1093
ARVCF	-0.188413	3.42469e-10	1.37496e-09	1093	1093
ARX	0.107776	0.00035772	0.000719258	1093	884
AR	0.294735	2.40079e-23	4.31265e-22	1093	1085
AS3MT	-0.0679989	0.0245692	0.0373589	1093	1092
ASAH1	0.0635766	0.0355884	0.0525868	1093	1093
ASAH2B	0.254341	1.34412e-17	1.2214e-16	1093	1040
ASAH2	0.214009	8.66848e-13	4.62205e-12	1093	1063
ASAM	-0.0403752	0.182256	0.231583	1093	1092
ASAP1IT1	0.00814939	0.787838	0.82582	1093	164
ASAP1	0.124333	3.75869e-05	8.61357e-05	1093	1093
ASAP2	0.183726	9.39917e-10	3.60632e-09	1093	1093
ASAP3	-0.190905	1.98087e-10	8.15952e-10	1093	1093
ASB10	-0.0102743	0.734387	0.779728	1093	76
ASB11	0.0139076	0.646027	0.700112	1093	77
ASB12	-0.212597	1.23071e-12	6.46806e-12	1093	792
ASB13	-0.122137	5.15568e-05	0.000115638	1093	1093
ASB14	-0.0520775	0.0852676	0.116679	1093	1092
ASB15	0.0714288	0.0181869	0.0282859	1093	460
ASB16	-0.0760958	0.0118514	0.0190847	1093	1090
ASB17	0.0376048	0.214143	0.267895	1093	41
ASB18	-0.0697059	0.0211844	0.0325834	1093	40
ASB1	-0.163472	5.4828e-08	1.73424e-07	1093	1093
ASB2	-0.284817	7.6109e-22	1.12627e-20	1093	1093
ASB3	-0.00384656	0.898921	0.919077	1093	1093
ASB4	-0.0855256	0.00466248	0.00803251	1093	576
ASB5	-0.0181934	0.547943	0.609109	1093	372
ASB6	-0.225153	4.994e-14	3.06074e-13	1093	1093
ASB7	0.180448	1.87528e-09	6.97219e-09	1093	1093
ASB8	0.230884	1.08324e-14	7.17946e-14	1093	1093
ASB9	-0.132628	1.08658e-05	2.65391e-05	1093	1093
ASCC1	0.163258	5.70938e-08	1.79998e-07	1093	1093
ASCC2	-0.0834438	0.00577386	0.00979894	1093	1093
ASCC3	0.261009	1.75938e-18	1.77479e-17	1093	1093
ASCL1	0.106302	0.000430969	0.000857301	1093	762
ASCL2	-0.0277488	0.359396	0.422763	1093	1093
ASCL3	-0.0604281	0.0457899	0.066396	1093	281
ASCL4	0.0898132	0.00295979	0.00524435	1093	788
ASF1A	0.137423	5.12199e-06	1.29593e-05	1093	1093
ASF1B	0.148283	8.48156e-07	2.34816e-06	1093	1093
ASFMR1	0.031444	0.29898	0.359458	1093	786
ASGR1	-0.378215	1.70221e-38	2.05437e-36	1093	1089
ASGR2	-0.272293	4.92828e-20	5.9372e-19	1093	1077
ASH1L	0.1262	2.86177e-05	6.66346e-05	1093	1093
ASH2L	0.112876	0.000184451	0.000385923	1093	1093
ASIP	-0.216679	4.43665e-13	2.44988e-12	1093	729
ASL	-0.132607	1.09013e-05	2.6616e-05	1093	1093
ASMTL	-0.254678	1.21449e-17	1.11012e-16	1093	1093
ASMT	-0.133383	9.66808e-06	2.37874e-05	1093	812
ASNA1	-0.081056	0.00733802	0.0122391	1093	1093
ASNSD1	0.0939971	0.00186499	0.00339495	1093	1093
ASNS	0.0370121	0.221458	0.276274	1093	1093
ASPA	-0.136294	6.12874e-06	1.53753e-05	1093	1057
ASPDH	-0.132158	1.16819e-05	2.83957e-05	1093	466
ASPG	-0.167177	2.70044e-08	8.86599e-08	1093	782
ASPHD1	-0.229289	1.66457e-14	1.07703e-13	1093	1091
ASPHD2	-0.0206517	0.495209	0.558062	1093	1093
ASPH	0.123577	4.19346e-05	9.54158e-05	1093	1093
ASPM	0.2496	5.50464e-17	4.67535e-16	1093	1093
ASPN	0.054049	0.074075	0.102808	1093	1093
ASPRV1	-0.332103	1.48903e-29	5.66254e-28	1093	1093
ASPSCR1	-0.200758	2.1149e-11	9.75198e-11	1093	1093
ASRGL1	-0.0163614	0.588966	0.648065	1093	1093
ASS1	-0.143333	1.95696e-06	5.2035e-06	1093	1093
ASTE1	-0.0455568	0.132275	0.173376	1093	1093
ASTL	-0.110301	0.000258586	0.000529456	1093	993
ASTN1	-0.172217	1.0047e-08	3.45147e-08	1093	1030
ASTN2	0.0844091	0.00523183	0.00894305	1093	1093
ASXL1	-0.122291	5.0433e-05	0.000113307	1093	1093
ASXL2	0.209565	2.5918e-12	1.31913e-11	1093	1093
ASXL3	-0.0622646	0.0395764	0.0580203	1093	1016
ASZ1	0.0158213	0.601326	0.659613	1093	145
ATAD1	0.198255	3.77434e-11	1.68861e-10	1093	1093
ATAD2B	0.204334	9.12119e-12	4.37604e-11	1093	1093
ATAD2	0.312974	2.89354e-26	7.26269e-25	1093	1093
ATAD3A	-0.249655	5.41666e-17	4.6045e-16	1093	1093
ATAD3B	-0.309745	9.84659e-26	2.3348e-24	1093	1093
ATAD3C	-0.234916	3.606e-15	2.52796e-14	1093	1093
ATAD5	0.182883	1.124e-09	4.27036e-09	1093	1093
ATCAY	-0.0712951	0.0184055	0.0285862	1093	423
ATE1	0.244193	2.6519e-16	2.08767e-15	1093	1093
ATF1	0.249291	6.0275e-17	5.09582e-16	1093	1093
ATF2	0.217011	4.0793e-13	2.2575e-12	1093	1093
ATF3	-0.185807	6.0232e-10	2.35769e-09	1093	1093
ATF4	-0.0964838	0.00140506	0.00260956	1093	1093
ATF5	-0.125642	3.10599e-05	7.19719e-05	1093	1093
ATF6B	-0.0713061	0.0183874	0.0285603	1093	1093
ATF6	0.163762	5.19018e-08	1.64659e-07	1093	1093
ATF7IP2	-0.0399157	0.187285	0.237405	1093	1093
ATF7IP	0.226859	3.18252e-14	1.99762e-13	1093	1093
ATF7	0.136879	5.5856e-06	1.40694e-05	1093	1093
ATG10	-0.0248086	0.412573	0.476747	1093	1093
ATG12	0.192169	1.49659e-10	6.27105e-10	1093	1093
ATG16L1	0.157481	1.66671e-07	5.00409e-07	1093	1093
ATG16L2	-0.253582	1.68771e-17	1.52264e-16	1093	1093
ATG2A	-0.120658	6.35925e-05	0.000140893	1093	1093
ATG2B	0.22352	7.65994e-14	4.58936e-13	1093	1093
ATG3	0.0182132	0.547508	0.608661	1093	1093
ATG4A	0.151308	5.01915e-07	1.425e-06	1093	1093
ATG4B	-0.31507	1.29614e-26	3.43732e-25	1093	1093
ATG4C	0.082076	0.00662848	0.0111359	1093	1093
ATG4D	-0.199907	2.57754e-11	1.17774e-10	1093	1093
ATG5	0.136362	6.06219e-06	1.52178e-05	1093	1093
ATG7	-0.0473454	0.117735	0.156084	1093	1093
ATG9A	-0.299074	5.06587e-24	9.88408e-23	1093	1093
ATG9B	-0.131484	1.29527e-05	3.13062e-05	1093	1092
ATHL1	-0.209567	2.59059e-12	1.31885e-11	1093	1093
ATIC	0.212006	1.42448e-12	7.43983e-12	1093	1093
ATL1	-0.0728372	0.016019	0.0251941	1093	1093
ATL2	-0.0214073	0.479562	0.542675	1093	1093
ATL3	0.276542	1.22635e-20	1.60396e-19	1093	1093
ATMIN	0.141395	2.69441e-06	7.05821e-06	1093	1093
ATM	0.027713	0.360017	0.423395	1093	1093
ATN1	-0.258501	3.80665e-18	3.67976e-17	1093	1093
ATOH1	-0.0545293	0.0715382	0.0996649	1093	31
ATOH7	-0.154076	3.07792e-07	8.97115e-07	1093	726
ATOH8	-0.31127	5.53306e-26	1.35174e-24	1093	1093
ATOX1	-0.0353082	0.243479	0.300767	1093	1093
ATP10A	-0.00490037	0.871444	0.89668	1093	1093
ATP10B	-0.119487	7.49608e-05	0.000164597	1093	928
ATP10D	-0.019515	0.519251	0.58132	1093	1093
ATP11A	-0.0481103	0.111913	0.149269	1093	1093
ATP11B	0.103309	0.00062462	0.00121682	1093	1093
ATP11C	0.0223688	0.460045	0.523617	1093	1093
ATP12A	-0.048255	0.110837	0.148011	1093	568
ATP13A1	-0.0918458	0.00237031	0.00425714	1093	1093
ATP13A2	-0.183728	9.39428e-10	3.60513e-09	1093	1093
ATP13A3	0.318201	3.85764e-27	1.07837e-25	1093	1093
ATP13A4	0.0920204	0.00232503	0.00418029	1093	1068
ATP13A5	0.0457431	0.130698	0.171544	1093	940
ATP1A1	-0.0558655	0.0648526	0.0913484	1093	1093
ATP1A2	-0.0646335	0.0326299	0.0485104	1093	1069
ATP1A3	0.0316572	0.295714	0.356125	1093	1088
ATP1A4	0.0167437	0.58029	0.639776	1093	1016
ATP1B1	-0.0721485	0.017049	0.0266581	1093	1093
ATP1B2	-0.168499	2.08961e-08	6.94184e-08	1093	1092
ATP1B3	-0.0187807	0.535096	0.596607	1093	1093
ATP1B4	0.0323781	0.284848	0.344832	1093	137
ATP2A1	-0.109592	0.00028345	0.000577181	1093	1091
ATP2A2	0.341688	2.72126e-31	1.29662e-29	1093	1093
ATP2A3	-0.0178345	0.555867	0.616559	1093	1093
ATP2B1	0.245699	1.71798e-16	1.37952e-15	1093	1093
ATP2B2	-0.134479	8.1528e-06	2.0219e-05	1093	1070
ATP2B3	-0.074928	0.0132192	0.0211119	1093	553
ATP2B4	-0.0393257	0.193895	0.245059	1093	1093
ATP2C1	0.192846	1.28674e-10	5.42331e-10	1093	1093
ATP2C2	0.192327	1.44472e-10	6.06252e-10	1093	1093
ATP4A	-0.191339	1.79966e-10	7.46186e-10	1093	390
ATP4B	-0.113986	0.000159076	0.000335656	1093	456
ATP5A1	0.0444389	0.142045	0.184871	1093	1093
ATP5B	0.283106	1.36269e-21	1.97165e-20	1093	1093
ATP5C1	0.10332	0.000623761	0.00121538	1093	1093
ATP5D	-0.280625	3.14815e-21	4.37895e-20	1093	1093
ATP5EP2	0.0299484	0.322565	0.384624	1093	1093
ATP5E	-0.0165191	0.58538	0.644577	1093	1093
ATP5F1	0.115885	0.000123147	0.000263206	1093	1093
ATP5G1	0.0137389	0.650033	0.703771	1093	1093
ATP5G2	0.0266942	0.377954	0.442039	1093	1093
ATP5G3	0.0176811	0.559271	0.619789	1093	1093
ATP5H	0.0847408	0.00505647	0.00866239	1093	1093
ATP5I	-0.0899846	0.00290536	0.00515835	1093	1093
ATP5J2	-0.074326	0.0139773	0.0222084	1093	1093
ATP5J	-0.0253294	0.402828	0.467227	1093	1093
ATP5L2	-0.0982267	0.00114765	0.00216117	1093	565
ATP5L	-0.110673	0.000246391	0.000506013	1093	1093
ATP5O	-0.0333273	0.270956	0.330137	1093	1093
ATP5SL	-0.0879969	0.00359645	0.00629714	1093	1093
ATP5S	0.296469	1.29301e-23	2.4175e-22	1093	1093
ATP6AP1L	-0.0297137	0.326374	0.388545	1093	1093
ATP6AP1	0.0631079	0.0369718	0.054523	1093	1093
ATP6AP2	0.11532	0.000132939	0.000282934	1093	1093
ATP6V0A1	-0.000391936	0.989673	0.991409	1093	1093
ATP6V0A2	0.130631	1.47513e-05	3.54704e-05	1093	1093
ATP6V0A4	0.0808311	0.00750331	0.0124983	1093	1031
ATP6V0B	-0.0691087	0.0223193	0.0341697	1093	1093
ATP6V0C	-0.0945954	0.00174318	0.00318674	1093	1093
ATP6V0D1	-0.0585567	0.0529457	0.07593	1093	1093
ATP6V0D2	0.0284359	0.347617	0.410585	1093	1084
ATP6V0E1	-0.0245665	0.41715	0.481346	1093	1093
ATP6V0E2	-0.0274453	0.364677	0.42825	1093	1093
ATP6V1A	0.232513	6.96328e-15	4.71906e-14	1093	1093
ATP6V1B1	-0.166328	3.18073e-08	1.0355e-07	1093	1093
ATP6V1B2	-0.0447366	0.13939	0.181745	1093	1093
ATP6V1C1	0.260616	1.98683e-18	1.9893e-17	1093	1093
ATP6V1C2	-0.106093	0.000442429	0.000878711	1093	1093
ATP6V1D	0.251212	3.41972e-17	2.97088e-16	1093	1093
ATP6V1E1	0.0167857	0.579339	0.638833	1093	1093
ATP6V1E2	-0.145744	1.30685e-06	3.54265e-06	1093	1093
ATP6V1F	-0.114051	0.000157711	0.000332844	1093	1093
ATP6V1G1	0.154466	2.87098e-07	8.39469e-07	1093	1093
ATP6V1G2	0.0726239	0.016332	0.0256504	1093	1093
ATP6V1G3	-0.111092	0.000233276	0.000480549	1093	156
ATP6V1H	0.135618	6.81853e-06	1.70391e-05	1093	1093
ATP7A	0.221437	1.3159e-13	7.66309e-13	1093	1093
ATP7B	0.192585	1.36395e-10	5.73672e-10	1093	1093
ATP8A1	0.141229	2.76879e-06	7.23613e-06	1093	1093
ATP8A2	0.0469323	0.120977	0.159835	1093	1083
ATP8B1	0.328468	6.54912e-29	2.29561e-27	1093	1093
ATP8B2	-0.115244	0.000134312	0.000285674	1093	1093
ATP8B3	-0.00443572	0.883542	0.906387	1093	1093
ATP8B4	-0.147168	1.02629e-06	2.81237e-06	1093	1093
ATP8B5P	-0.099241	0.00101866	0.00193107	1093	1093
ATP9A	0.199304	2.96388e-11	1.34604e-10	1093	1093
ATP9B	-0.0868512	0.0040596	0.00705356	1093	1093
ATPAF1	0.0935282	0.00196586	0.00356762	1093	1093
ATPAF2	-0.141365	2.70747e-06	7.08782e-06	1093	1093
ATPBD4	0.272035	5.35691e-20	6.41143e-19	1093	1093
ATPIF1	-0.144072	1.73021e-06	4.63237e-06	1093	1093
ATRIP	-0.0181371	0.549183	0.610388	1093	1093
ATRNL1	-0.00936446	0.757134	0.80017	1093	1075
ATRN	0.15993	1.06318e-07	3.26204e-07	1093	1093
ATRX	0.19755	4.43751e-11	1.96697e-10	1093	1093
ATR	0.194024	9.87966e-11	4.21874e-10	1093	1093
ATXN10	0.137533	5.03289e-06	1.27515e-05	1093	1093
ATXN1L	0.0280429	0.354324	0.417503	1093	1093
ATXN1	0.022864	0.45017	0.513976	1093	1093
ATXN2L	-0.148597	8.03572e-07	2.22932e-06	1093	1093
ATXN2	0.135122	7.3714e-06	1.8367e-05	1093	1093
ATXN3L	-0.0327412	0.279477	0.339309	1093	32
ATXN3	0.101074	0.000818958	0.00157051	1093	1093
ATXN7L1	-0.0410973	0.174554	0.22285	1093	1093
ATXN7L2	-0.246928	1.20278e-16	9.85052e-16	1093	1093
ATXN7L3B	0.316109	8.68171e-27	2.33307e-25	1093	1093
ATXN7L3	-0.18469	7.6531e-10	2.96631e-09	1093	1093
ATXN7	0.0965653	0.00139192	0.00258707	1093	1093
ATXN8OS	-0.0118994	0.694345	0.743476	1093	72
AUH	-0.0274882	0.363928	0.42752	1093	1093
AUP1	-0.0740591	0.0143255	0.0227111	1093	1093
AURKAIP1	-0.272112	5.22626e-20	6.2625e-19	1093	1093
AURKAPS1	0.0208844	0.49036	0.553124	1093	1093
AURKA	0.257609	4.99787e-18	4.77177e-17	1093	1093
AURKB	0.0656813	0.0299069	0.0447826	1093	1093
AURKC	-0.102409	0.000697027	0.00134914	1093	1091
AUTS2	-0.0399394	0.187024	0.237104	1093	1093
AVEN	-0.032111	0.288842	0.348892	1093	1093
AVIL	-0.00730055	0.809487	0.843932	1093	1093
AVL9	0.331699	1.75691e-29	6.55749e-28	1093	1093
AVPI1	-0.293288	4.0096e-23	7.00898e-22	1093	1093
AVPR1A	0.116321	0.000116043	0.000248894	1093	1079
AVPR1B	-0.113565	0.000168284	0.000354009	1093	270
AVPR2	-0.288116	2.44734e-22	3.89008e-21	1093	1082
AVP	-0.079642	0.0084341	0.0139393	1093	41
AWAT1	0.0312603	0.301813	0.362474	1093	286
AWAT2	0.0846397	0.00510932	0.00874997	1093	618
AXIN1	-0.270284	9.43151e-20	1.10071e-18	1093	1093
AXIN2	-0.0166801	0.581729	0.641222	1093	1093
AXL	-0.0413625	0.171786	0.219706	1093	1093
AZGP1	0.0365649	0.227094	0.282432	1093	1092
AZI1	-0.286078	4.94165e-22	7.54538e-21	1093	1093
AZI2	0.217841	3.30548e-13	1.84958e-12	1093	1093
AZIN1	0.385975	3.77702e-40	5.39899e-38	1093	1093
AZU1	-0.17622	4.4851e-09	1.5991e-08	1093	917
B2M	-0.0694546	0.0216556	0.0332269	1093	1093
B3GALNT1	0.191128	1.88542e-10	7.79341e-10	1093	1093
B3GALNT2	0.125925	2.97979e-05	6.92308e-05	1093	1093
B3GALT1	-0.0919377	0.00234639	0.00421605	1093	796
B3GALT2	-0.121462	5.67525e-05	0.000126546	1093	1065
B3GALT4	-0.272864	4.09357e-20	4.99431e-19	1093	1093
B3GALT5	0.0781371	0.00975903	0.0159472	1093	1050
B3GALT6	-0.270057	1.01447e-19	1.17781e-18	1093	1093
B3GALTL	0.0427494	0.157847	0.203285	1093	1093
B3GAT1	-0.157366	1.70189e-07	5.10289e-07	1093	1070
B3GAT2	-0.0761606	0.0117793	0.0189747	1093	1078
B3GAT3	-0.293069	4.33096e-23	7.55109e-22	1093	1093
B3GNT1	-0.017393	0.565692	0.62577	1093	1093
B3GNT2	0.116484	0.000113497	0.000243666	1093	1093
B3GNT3	-0.0442427	0.143815	0.186909	1093	1078
B3GNT4	-0.0547396	0.0704501	0.0983529	1093	1066
B3GNT5	-0.185752	6.09458e-10	2.38378e-09	1093	1093
B3GNT6	0.126603	2.69674e-05	6.3025e-05	1093	291
B3GNT7	-0.153816	3.22371e-07	9.37304e-07	1093	1093
B3GNT8	-0.18952	2.68763e-10	1.09102e-09	1093	1093
B3GNT9	-0.211512	1.60874e-12	8.35242e-12	1093	1093
B3GNTL1	-0.253484	1.73806e-17	1.56456e-16	1093	1093
B4GALNT1	-0.118777	8.27513e-05	0.00018066	1093	1092
B4GALNT2	0.218577	2.74148e-13	1.54429e-12	1093	851
B4GALNT3	-0.184057	8.75911e-10	3.37166e-09	1093	1093
B4GALNT4	-0.260846	1.85075e-18	1.85859e-17	1093	1093
B4GALT1	0.0761628	0.0117769	0.0189723	1093	1093
B4GALT2	-0.256774	6.44345e-18	6.06292e-17	1093	1093
B4GALT3	-0.0768906	0.0109936	0.0177873	1093	1093
B4GALT4	0.000747285	0.980312	0.984072	1093	1093
B4GALT5	0.0821084	0.00660702	0.0111026	1093	1093
B4GALT6	0.0135917	0.653536	0.707071	1093	1092
B4GALT7	-0.262139	1.2395e-18	1.27917e-17	1093	1093
B9D1	-0.178857	2.61017e-09	9.54946e-09	1093	1093
B9D2	-0.295459	1.85518e-23	3.3961e-22	1093	1093
BAALC	-0.0692728	0.0220023	0.0337127	1093	1093
BAAT	0.022702	0.453387	0.517061	1093	814
BACE1	-0.0435191	0.150491	0.194664	1093	1093
BACE2	-0.0698579	0.0209036	0.0321809	1093	1093
BACH1	0.0998564	0.00094707	0.00180145	1093	1093
BACH2	-0.148032	8.85479e-07	2.4441e-06	1093	1093
BAD	-0.256797	6.39947e-18	6.02435e-17	1093	1093
BAG1	-0.0523319	0.0837505	0.114783	1093	1093
BAG2	-0.105505	0.000476179	0.00094129	1093	1093
BAG3	0.0729192	0.0159001	0.0250149	1093	1093
BAG4	0.21474	7.22168e-13	3.88763e-12	1093	1093
BAG5	0.324757	2.90941e-28	9.3973e-27	1093	1093
BAGE2	0.187396	4.27295e-10	1.70099e-09	1093	1005
BAGE	0.0725885	0.0163845	0.0257228	1093	177
BAHCC1	-0.278396	6.63255e-21	8.94175e-20	1093	1093
BAHD1	-0.0318099	0.29339	0.353834	1093	1093
BAI1	-0.210103	2.27285e-12	1.16386e-11	1093	1085
BAI2	-0.133866	8.96967e-06	2.21522e-05	1093	1093
BAI3	-0.122972	4.57474e-05	0.00010353	1093	985
BAIAP2L1	0.00187487	0.950632	0.960352	1093	1093
BAIAP2L2	-0.253301	1.83566e-17	1.64874e-16	1093	1089
BAIAP2	0.041374	0.171667	0.219568	1093	1093
BAIAP3	-0.00715146	0.813306	0.846966	1093	1093
BAK1	-0.0996918	0.000965754	0.00183561	1093	1093
BAMBI	0.0169562	0.575492	0.635077	1093	1093
BANF1	-0.0311217	0.303963	0.364752	1093	1093
BANF2	-0.0978438	0.00120015	0.00225371	1093	102
BANK1	-0.0928689	0.00211614	0.00382484	1093	1083
BANP	-0.276317	1.32096e-20	1.72101e-19	1093	1093
BAP1	-0.257796	4.72197e-18	4.51477e-17	1093	1093
BARD1	0.245545	1.79631e-16	1.44069e-15	1093	1085
BARHL1	-0.0329761	0.276041	0.335642	1093	187
BARHL2	-0.178911	2.58112e-09	9.44832e-09	1093	152
BARX1	-0.204446	8.88066e-12	4.2647e-11	1093	997
BARX2	-0.0724716	0.0165587	0.0259782	1093	1091
BASE	0.110159	0.000263405	0.000538813	1093	281
BASP1	-0.0739476	0.0144732	0.0229185	1093	1093
BAT1	-0.148606	8.024e-07	2.22637e-06	1093	1093
BAT2L1	0.0772506	0.0106235	0.0172369	1093	1093
BAT2L2	0.206382	5.59527e-12	2.7452e-11	1093	1093
BAT2	-0.0216196	0.475215	0.538783	1093	1093
BAT3	-0.196707	5.38078e-11	2.36738e-10	1093	1093
BAT4	-0.318695	3.18246e-27	8.99613e-26	1093	1093
BAT5	-0.161098	8.56035e-08	2.64866e-07	1093	1093
BATF2	-0.0662645	0.0284778	0.0427888	1093	1093
BATF3	-0.375423	6.53531e-38	7.2773e-36	1093	1093
BATF	-0.053695	0.0759911	0.105185	1093	1093
BAX	-0.331765	1.71006e-29	6.39449e-28	1093	1093
BAZ1A	0.35624	4.75376e-34	3.25891e-32	1093	1093
BAZ1B	0.177819	3.23294e-09	1.1701e-08	1093	1093
BAZ2A	0.183009	1.09438e-09	4.16254e-09	1093	1093
BAZ2B	0.0974299	0.00125939	0.00235835	1093	1093
BBC3	-0.298252	6.81551e-24	1.30329e-22	1093	1093
BBOX1	-0.215514	5.9493e-13	3.2329e-12	1093	1033
BBS10	0.184228	8.44685e-10	3.25456e-09	1093	1093
BBS12	-0.0975348	0.00124412	0.0023315	1093	1093
BBS1	0.0332001	0.27279	0.33221	1093	1093
BBS2	-0.0500876	0.0979106	0.132344	1093	1093
BBS4	0.0736874	0.0148231	0.0234358	1093	1093
BBS5	-0.133926	8.88611e-06	2.19539e-05	1093	1093
BBS7	0.10851	0.000325746	0.000658847	1093	1093
BBS9	0.000608485	0.983969	0.986759	1093	1093
BBX	0.11901	8.01127e-05	0.000175336	1093	1093
BCAM	-0.0595464	0.0490531	0.0707807	1093	1093
BCAN	-0.278501	6.40558e-21	8.64731e-20	1093	1079
BCAP29	0.0923065	0.00225258	0.00405727	1093	1093
BCAP31	-0.0470468	0.120071	0.158805	1093	1093
BCAR1	-0.251976	2.72515e-17	2.39849e-16	1093	1093
BCAR3	0.0153199	0.612904	0.67027	1093	1093
BCAR4	0.0720597	0.0171859	0.0268513	1093	541
BCAS1	0.273514	3.31277e-20	4.08623e-19	1093	1092
BCAS2	0.0854806	0.00468429	0.00806733	1093	1093
BCAS3	0.0478692	0.113723	0.151323	1093	1093
BCAS4	-0.124233	3.81391e-05	8.7302e-05	1093	1093
BCAT1	0.0574274	0.0576993	0.0821859	1093	1093
BCAT2	-0.0510697	0.0914952	0.124382	1093	1093
BCCIP	0.139001	3.9768e-06	1.0204e-05	1093	1093
BCDIN3D	0.208509	3.35047e-12	1.68233e-11	1093	1093
BCHE	-0.0886056	0.0033704	0.00592245	1093	1077
BCKDHA	-0.210282	2.17549e-12	1.11627e-11	1093	1093
BCKDHB	0.0297146	0.32636	0.388545	1093	1093
BCKDK	-0.0695175	0.0215368	0.0330723	1093	1093
BCL10	0.0554412	0.0669174	0.0938959	1093	1093
BCL11A	-0.241843	5.19007e-16	3.95486e-15	1093	1091
BCL11B	-0.13308	1.01326e-05	2.48626e-05	1093	1093
BCL2A1	-0.123096	4.49401e-05	0.000101783	1093	1093
BCL2L10	-0.111955	0.000208312	0.000432392	1093	982
BCL2L11	0.181508	1.50197e-09	5.63938e-09	1093	1093
BCL2L12	-0.187252	4.40878e-10	1.75264e-09	1093	1093
BCL2L13	0.151405	4.93522e-07	1.40335e-06	1093	1093
BCL2L14	-0.162956	6.04371e-08	1.90211e-07	1093	1074
BCL2L15	0.0516363	0.0879503	0.119984	1093	1092
BCL2L1	0.0806268	0.00765635	0.0127353	1093	1093
BCL2L2	0.0423909	0.161366	0.207432	1093	1093
BCL2	-0.0496126	0.101139	0.136352	1093	1093
BCL3	-0.0975696	0.00123911	0.00232254	1093	1093
BCL6B	-0.129446	1.76495e-05	4.2048e-05	1093	1093
BCL6	-0.2343	4.27094e-15	2.96115e-14	1093	1093
BCL7A	0.0542863	0.0728125	0.101202	1093	1093
BCL7B	-0.207	4.82306e-12	2.38666e-11	1093	1093
BCL7C	-0.326707	1.33235e-28	4.47557e-27	1093	1093
BCL8	0.034531	0.254016	0.312215	1093	962
BCL9L	-0.105065	0.000502993	0.000990998	1093	1093
BCL9	0.0357291	0.237902	0.2946	1093	1093
BCLAF1	0.277961	7.66585e-21	1.02593e-19	1093	1093
BCMO1	-0.0325745	0.281934	0.341776	1093	1006
BCO2	-0.193396	1.13756e-10	4.81771e-10	1093	1090
BCORL1	-0.112524	0.000193244	0.000403113	1093	1093
BCORL2	-0.00163293	0.956996	0.965281	1093	17
BCOR	0.140435	3.15204e-06	8.17624e-06	1093	1093
BCR	-0.0854866	0.00468136	0.00806366	1093	1093
BCS1L	-0.188412	3.4253e-10	1.37496e-09	1093	1093
BCYRN1	0.04253	0.159994	0.205826	1093	11
BDH1	0.0499192	0.0990459	0.133735	1093	1093
BDH2	-0.190625	2.10742e-10	8.64898e-10	1093	1093
BDKRB1	0.120026	6.9505e-05	0.000153084	1093	1090
BDKRB2	0.103038	0.00064563	0.00125569	1093	1093
BDNFOS	-0.115071	0.00013749	0.000291973	1093	1093
BDNF	-0.0385283	0.203096	0.25539	1093	1076
BDP1	0.239518	1.00164e-15	7.43852e-15	1093	1093
BEAN	-0.107021	0.000393639	0.000786848	1093	1093
BECN1	0.0363032	0.230441	0.286205	1093	1093
BEGAIN	-0.238323	1.40066e-15	1.02469e-14	1093	1089
BEND2	-0.0202548	0.503535	0.565899	1093	125
BEND3	0.18058	1.82398e-09	6.79275e-09	1093	1093
BEND4	-0.120498	6.50392e-05	0.000143751	1093	845
BEND5	-0.348139	1.69853e-32	9.45687e-31	1093	1093
BEND6	-0.0223157	0.461112	0.524624	1093	1093
BEND7	-0.118664	8.40604e-05	0.000183319	1093	1093
BEST1	-0.230647	1.15498e-14	7.61984e-14	1093	1093
BEST2	-0.0892518	0.00314466	0.00555044	1093	352
BEST3	0.10241	0.000696942	0.00134912	1093	905
BEST4	-0.183795	9.26289e-10	3.55607e-09	1093	1073
BET1L	-0.0263331	0.384443	0.448494	1093	1093
BET1	0.0301548	0.31924	0.380974	1093	1093
BET3L	-0.0555959	0.0661582	0.0929697	1093	826
BEX1	-0.0395227	0.191669	0.242473	1093	1033
BEX2	-0.205254	7.3275e-12	3.55099e-11	1093	1093
BEX4	-0.070086	0.0204885	0.0315707	1093	1093
BEX5	-0.0325252	0.282664	0.342517	1093	1089
BEYLA	0.0334848	0.268697	0.32776	1093	11
BFAR	0.108489	0.000326609	0.000660394	1093	1093
BFSP1	0.0646637	0.0325485	0.0484036	1093	1093
BFSP2	-0.0896771	0.00300366	0.00531509	1093	943
BGLAP	-0.23839	1.37439e-15	1.0073e-14	1093	1093
BGN	-0.146972	1.06114e-06	2.90352e-06	1093	1093
BHLHA15	-0.00570589	0.850543	0.878527	1093	1041
BHLHB9	0.015235	0.614872	0.672049	1093	1093
BHLHE22	-0.158846	1.29843e-07	3.94659e-07	1093	1088
BHLHE23	-0.0579278	0.0555508	0.079378	1093	11
BHLHE40	0.034867	0.249422	0.307168	1093	1093
BHLHE41	-0.109666	0.000280753	0.000571978	1093	1093
BHMT2	-0.135265	7.20817e-06	1.79714e-05	1093	1091
BHMT	-0.193794	1.04045e-10	4.42972e-10	1093	858
BICC1	0.0851282	0.00485836	0.008345	1093	1087
BICD1	-0.014685	0.627701	0.683658	1093	1093
BICD2	-0.0661728	0.0286984	0.0430818	1093	1093
BID	-0.125096	3.36403e-05	7.76389e-05	1093	1093
BIK	0.171761	1.10003e-08	3.7642e-08	1093	1093
BIN1	-0.387171	2.08117e-40	3.03956e-38	1093	1093
BIN2	-0.152479	4.08554e-07	1.17183e-06	1093	1093
BIN3	-0.392762	1.24101e-41	2.29472e-39	1093	1093
BIRC2	0.0171566	0.570985	0.630794	1093	1093
BIRC3	-0.126332	2.80663e-05	6.54183e-05	1093	1093
BIRC5	0.142234	2.3471e-06	6.19266e-06	1093	1093
BIRC6	0.255901	8.39747e-18	7.82483e-17	1093	1093
BIRC7	-0.0577676	0.0562315	0.0802823	1093	981
BIRC8	-0.00252653	0.933507	0.94704	1093	17
BIVM	-0.0113992	0.706585	0.754596	1093	1093
BLCAP	-0.0756763	0.0123275	0.0197977	1093	1093
BLID	-0.0466475	0.123252	0.162606	1093	89
BLK	-0.197556	4.432e-11	1.96539e-10	1093	981
BLMH	-0.0164176	0.587687	0.646764	1093	1093
BLM	0.206403	5.56758e-12	2.73228e-11	1093	1093
BLNK	0.0404631	0.181305	0.230491	1093	1093
BLOC1S1	-0.209095	2.9061e-12	1.46909e-11	1093	1093
BLOC1S2	0.152093	4.37374e-07	1.25004e-06	1093	1093
BLOC1S3	0.117434	9.96355e-05	0.00021556	1093	1093
BLVRA	0.118828	8.21691e-05	0.000179486	1093	1093
BLVRB	-0.00283224	0.925484	0.940529	1093	1093
BLZF1	0.209409	2.69203e-12	1.36739e-11	1093	1093
BMF	-0.117277	0.000101809	0.000220049	1093	1093
BMI1	0.163537	5.41567e-08	1.71462e-07	1093	1093
BMP10	-0.0840211	0.00544392	0.00927727	1093	66
BMP15	0.0588454	0.0517845	0.0743652	1093	103
BMP1	-0.223325	8.06029e-14	4.81206e-13	1093	1093
BMP2K	0.126764	2.63343e-05	6.16312e-05	1093	1093
BMP2	-0.257629	4.96809e-18	4.74559e-17	1093	1091
BMP3	-0.0290021	0.338098	0.401034	1093	846
BMP4	0.0909753	0.0026082	0.00465825	1093	1093
BMP5	-0.0771546	0.0107211	0.0173897	1093	851
BMP6	-0.230742	1.12561e-14	7.43581e-14	1093	1092
BMP7	-0.077537	0.0103371	0.016821	1093	1091
BMP8A	0.12058	6.4292e-05	0.000142271	1093	1093
BMP8B	0.147858	9.12269e-07	2.51323e-06	1093	1092
BMPER	-0.18962	2.6296e-10	1.06876e-09	1093	1082
BMPR1A	0.199461	2.85793e-11	1.29997e-10	1093	1093
BMPR1B	0.00862338	0.775818	0.815914	1093	1092
BMPR2	0.11556	0.000128704	0.000274414	1093	1093
BMS1P4	0.0812832	0.00717434	0.011984	1093	1090
BMS1P5	0.012063	0.69036	0.73996	1093	1093
BMS1	0.0939057	0.00188427	0.00342725	1093	1093
BMX	-0.137738	4.87062e-06	1.23621e-05	1093	1069
BNC1	-0.105429	0.000480674	0.000949522	1093	1036
BNC2	0.0219801	0.46788	0.531335	1093	1093
BNIP1	0.0505247	0.0950128	0.128816	1093	1093
BNIP2	-0.0793247	0.00869928	0.014334	1093	1093
BNIP3L	0.00187704	0.950575	0.960343	1093	1093
BNIP3	0.123814	4.05203e-05	9.24272e-05	1093	1093
BNIPL	-0.120646	6.36978e-05	0.000141096	1093	1093
BOC	-0.365018	8.75732e-36	7.74139e-34	1093	1093
BOD1L	0.160243	1.00328e-07	3.08578e-07	1093	1093
BOD1	-0.0881768	0.00352825	0.00618794	1093	1093
BOK	-0.176002	4.68931e-09	1.66719e-08	1093	1093
BOLA1	-0.216376	4.7893e-13	2.63164e-12	1093	1093
BOLA2	-0.0791194	0.00887479	0.0145982	1093	1093
BOLA3	0.0745307	0.0137153	0.0218282	1093	1093
BOLL	-0.00767917	0.799812	0.83572	1093	411
BOP1	-0.0995262	0.000984879	0.00186949	1093	1093
BPESC1	-0.0401785	0.184396	0.234185	1093	91
BPGM	0.0759294	0.0120382	0.0193624	1093	1093
BPHL	0.100787	0.00084759	0.0016228	1093	1093
BPIL1	0.216059	5.18665e-13	2.83683e-12	1093	946
BPIL2	-0.0990443	0.00104257	0.00197398	1093	190
BPIL3	0.11097	0.000237013	0.000487697	1093	179
BPI	-0.272413	4.74011e-20	5.73796e-19	1093	830
BPNT1	0.0851288	0.00485804	0.008345	1093	1093
BPTF	0.276651	1.18281e-20	1.55307e-19	1093	1093
BRAF	0.162912	6.09353e-08	1.91659e-07	1093	1093
BRAP	0.179518	2.27591e-09	8.38591e-09	1093	1093
BRCA1	0.236507	2.3226e-15	1.66236e-14	1093	1093
BRCA2	0.262929	9.69109e-19	1.00943e-17	1093	1093
BRCC3	0.365671	6.47513e-36	5.80028e-34	1093	1093
BRD1	-0.118487	8.61512e-05	0.000187575	1093	1093
BRD2	0.121281	5.8229e-05	0.000129637	1093	1093
BRD3	0.1506	5.68047e-07	1.60193e-06	1093	1093
BRD4	-0.064359	0.0333772	0.0495411	1093	1093
BRD7P3	-0.0591159	0.0507158	0.07299	1093	571
BRD7	0.0907405	0.00267601	0.00477342	1093	1093
BRD8	-0.0121123	0.68916	0.73891	1093	1093
BRD9	-0.259592	2.72394e-18	2.67158e-17	1093	1093
BRDT	0.0408665	0.176988	0.225615	1093	674
BREA2	-0.234628	3.90342e-15	2.72509e-14	1093	1074
BRE	-0.0493239	0.103143	0.138821	1093	1093
BRF1	-0.150607	5.67388e-07	1.60052e-06	1093	1093
BRF2	0.0391487	0.19591	0.247382	1093	1093
BRI3BP	0.245509	1.81511e-16	1.45462e-15	1093	1093
BRI3	-0.264391	6.13502e-19	6.52616e-18	1093	1093
BRIP1	0.27664	1.18743e-20	1.55812e-19	1093	1093
BRIX1	0.136431	5.997e-06	1.50635e-05	1093	1093
BRMS1L	0.231372	9.49391e-15	6.33275e-14	1093	1093
BRMS1	-0.134439	8.20307e-06	2.03311e-05	1093	1093
BRP44L	-0.0630342	0.0371936	0.0548341	1093	1093
BRP44	0.109094	0.000302243	0.000613713	1093	1093
BRPF1	-0.171215	1.22576e-08	4.16754e-08	1093	1093
BRPF3	0.214076	8.52364e-13	4.55083e-12	1093	1093
BRS3	-0.023381	0.43999	0.504037	1093	225
BRSK1	-0.229128	1.73788e-14	1.12014e-13	1093	1093
BRSK2	0.0200562	0.507729	0.570131	1093	1054
BRWD1	0.243524	3.21254e-16	2.50381e-15	1093	1093
BRWD3	0.236124	2.5826e-15	1.83541e-14	1093	1093
BSCL2	-0.0150936	0.61816	0.674916	1093	1093
BSDC1	-0.0813062	0.0071579	0.0119585	1093	1093
BSG	-0.134802	7.75086e-06	1.92601e-05	1093	1093
BSND	-0.185987	5.79398e-10	2.27371e-09	1093	609
BSN	-0.0321728	0.287913	0.347958	1093	1091
BSPRY	0.033043	0.275067	0.334619	1093	1092
BST1	-0.128364	2.07606e-05	4.91344e-05	1093	1093
BST2	-0.0890177	0.00322478	0.00568141	1093	1093
BSX	0.000930238	0.975494	0.980455	1093	18
BTAF1	0.145136	1.44777e-06	3.90678e-06	1093	1093
BTBD10	0.270815	7.94849e-20	9.34666e-19	1093	1093
BTBD11	0.0233094	0.441392	0.505354	1093	1093
BTBD12	0.122757	4.71807e-05	0.000106547	1093	1093
BTBD16	-0.144695	1.55899e-06	4.19343e-06	1093	654
BTBD17	-0.136482	5.94842e-06	1.49471e-05	1093	279
BTBD18	-0.0280991	0.353361	0.416588	1093	969
BTBD19	-0.0978348	0.00120142	0.00225589	1093	1088
BTBD1	0.171705	1.11237e-08	3.80124e-08	1093	1093
BTBD2	-0.280831	2.93806e-21	4.10372e-20	1093	1093
BTBD3	0.0717487	0.0176732	0.0275683	1093	1093
BTBD6	-0.146483	1.15311e-06	3.14323e-06	1093	1093
BTBD7	0.274742	2.21695e-20	2.79616e-19	1093	1093
BTBD8	0.0937644	0.00191444	0.00347805	1093	1048
BTBD9	0.055318	0.0675271	0.094692	1093	1093
BTC	0.0494538	0.102238	0.137695	1093	1054
BTD	0.0420062	0.165207	0.211964	1093	1093
BTF3L1	0.0303287	0.316457	0.378034	1093	242
BTF3L4	0.19194	1.57485e-10	6.5771e-10	1093	1093
BTF3	0.0663023	0.0283871	0.0426653	1093	1093
BTG1	-0.0957711	0.00152486	0.0028183	1093	1093
BTG2	-0.106886	0.000400417	0.000799842	1093	1093
BTG3	-0.118602	8.47851e-05	0.00018476	1093	1093
BTG4	-0.0042147	0.889307	0.911466	1093	271
BTK	-0.115848	0.000123762	0.000264408	1093	1093
BTLA	-0.0837185	0.00561467	0.00954484	1093	1077
BTN1A1	-0.123842	4.03617e-05	9.20863e-05	1093	857
BTN2A1	-0.27323	3.63415e-20	4.45537e-19	1093	1093
BTN2A2	-0.226939	3.11534e-14	1.95668e-13	1093	1093
BTN2A3	-0.122596	4.82787e-05	0.000108758	1093	1092
BTN3A1	-0.130257	1.56131e-05	3.74044e-05	1093	1093
BTN3A2	-0.120925	6.12367e-05	0.000136003	1093	1093
BTN3A3	-0.0692339	0.0220771	0.0338169	1093	1093
BTNL2	-0.0866175	0.00416043	0.00721631	1093	279
BTNL3	0.072225	0.0169318	0.0264994	1093	326
BTNL8	0.0257763	0.394577	0.458792	1093	667
BTNL9	-0.156677	1.92868e-07	5.75079e-07	1093	1093
BTRC	0.0667561	0.0273189	0.0411982	1093	1093
BUB1B	0.279757	4.21192e-21	5.76707e-20	1093	1093
BUB1	0.227568	2.63582e-14	1.66588e-13	1093	1093
BUB3	0.226543	3.45985e-14	2.16294e-13	1093	1093
BUD13	-0.139655	3.57782e-06	9.22606e-06	1093	1093
BUD31	-0.119993	6.98303e-05	0.00015375	1093	1093
BVES	-0.0622876	0.0395033	0.05793	1093	1093
BYSL	0.0188698	0.533161	0.594779	1093	1093
BZRAP1	-0.248377	7.88257e-17	6.58951e-16	1093	1093
BZW1	0.323363	5.06772e-28	1.59096e-26	1093	1093
BZW2	0.238764	1.23795e-15	9.11947e-15	1093	1093
C10orf105	-0.291011	8.93347e-23	1.48682e-21	1093	1085
C10orf107	-0.140442	3.14816e-06	8.16722e-06	1093	1039
C10orf108	-0.184198	8.50022e-10	3.2745e-09	1093	1024
C10orf10	-0.318853	2.99186e-27	8.49308e-26	1093	1093
C10orf110	-0.0557935	0.0651994	0.0917855	1093	1091
C10orf111	-0.171725	1.10787e-08	3.78846e-08	1093	1078
C10orf113	-0.0988375	0.00106829	0.00202015	1093	227
C10orf114	-0.257203	5.65691e-18	5.36037e-17	1093	1093
C10orf116	0.0314968	0.298168	0.358621	1093	1093
C10orf118	0.228367	2.13055e-14	1.35976e-13	1093	1093
C10orf119	0.211857	1.47762e-12	7.70541e-12	1093	1093
C10orf11	-0.245733	1.70142e-16	1.36786e-15	1093	1093
C10orf120	-0.0367157	0.225183	0.280366	1093	32
C10orf122	0.0117881	0.697063	0.745678	1093	158
C10orf125	-0.246274	1.45467e-16	1.18078e-15	1093	1093
C10orf128	-0.118006	9.20874e-05	0.000199916	1093	1069
C10orf129	-0.00541264	0.858141	0.88524	1093	339
C10orf12	0.284931	7.31998e-22	1.08801e-20	1093	1093
C10orf131	0.0827982	0.00616404	0.0104146	1093	832
C10orf137	0.0926077	0.00217856	0.00393166	1093	1093
C10orf140	-0.0838402	0.00554543	0.0094343	1093	1093
C10orf18	0.117834	9.42993e-05	0.000204454	1093	1093
C10orf25	-0.140959	2.89374e-06	7.54505e-06	1093	1093
C10orf26	-0.0842113	0.00533901	0.00911004	1093	1093
C10orf27	0.220869	1.52372e-13	8.81981e-13	1093	470
C10orf28	0.0266871	0.37808	0.442161	1093	1093
C10orf2	0.0212067	0.483689	0.54667	1093	1093
C10orf32	0.0758057	0.0121789	0.0195699	1093	1093
C10orf35	-0.166858	2.8721e-08	9.40972e-08	1093	1093
C10orf40	-0.0258133	0.3939	0.45811	1093	99
C10orf41	-0.234798	3.72458e-15	2.60746e-14	1093	1093
C10orf46	0.236115	2.58939e-15	1.83959e-14	1093	1093
C10orf47	-0.00980902	0.745992	0.790143	1093	1093
C10orf4	-0.0244471	0.419418	0.483575	1093	1093
C10orf50	-0.289736	1.39435e-22	2.27004e-21	1093	544
C10orf53	0.0781919	0.00970774	0.0158699	1093	62
C10orf54	-0.385664	4.40787e-40	6.25638e-38	1093	1093
C10orf55	-0.116748	0.00010947	0.000235598	1093	1086
C10orf57	0.224008	6.74389e-14	4.05983e-13	1093	1093
C10orf58	0.00770651	0.799114	0.835251	1093	1093
C10orf62	-0.037897	0.210602	0.263924	1093	329
C10orf67	-0.154463	2.87246e-07	8.39781e-07	1093	697
C10orf68	-0.145672	1.32269e-06	3.58365e-06	1093	1085
C10orf71	0.0518862	0.0864224	0.118123	1093	101
C10orf72	-0.0741694	0.0141807	0.0225084	1093	1093
C10orf75	0.118941	8.08896e-05	0.000176941	1093	1093
C10orf76	0.0683413	0.0238549	0.0363414	1093	1093
C10orf78	0.0187401	0.53598	0.597559	1093	1093
C10orf79	-0.046212	0.126796	0.166856	1093	1092
C10orf81	0.0769025	0.0109812	0.0177715	1093	1092
C10orf82	0.0954995	0.00157294	0.00289918	1093	968
C10orf84	0.0474837	0.116665	0.154809	1093	1093
C10orf88	0.157577	1.63764e-07	4.9249e-07	1093	1093
C10orf90	-0.272569	4.50541e-20	5.47357e-19	1093	960
C10orf91	-0.0851657	0.00483958	0.00831416	1093	851
C10orf93	-0.0165725	0.584168	0.643524	1093	935
C10orf95	-0.00791818	0.793719	0.830633	1093	1092
C10orf96	0.0134727	0.656374	0.709557	1093	70
C10orf99	-0.0616193	0.0416727	0.0608853	1093	196
C11orf10	-0.0560794	0.0638318	0.0900238	1093	1093
C11orf16	-0.112306	0.000198881	0.000414096	1093	860
C11orf17	-0.0680316	0.0245	0.0372594	1093	1093
C11orf1	-0.0313529	0.300383	0.360908	1093	1093
C11orf20	-0.0632028	0.0366882	0.0541365	1093	756
C11orf21	-0.262821	1.00244e-18	1.04361e-17	1093	1071
C11orf24	-0.012754	0.673618	0.725061	1093	1093
C11orf2	-0.237338	1.84355e-15	1.33274e-14	1093	1093
C11orf30	0.236234	2.50538e-15	1.78305e-14	1093	1093
C11orf31	-0.142188	2.36511e-06	6.2361e-06	1093	1093
C11orf34	-0.107832	0.000355184	0.00071473	1093	480
C11orf35	-0.218239	2.9878e-13	1.67741e-12	1093	1093
C11orf36	-0.102263	0.000709516	0.00137186	1093	95
C11orf41	-0.043075	0.154703	0.199695	1093	1093
C11orf42	0.0537999	0.0754191	0.10448	1093	812
C11orf45	-0.0892423	0.00314785	0.00555559	1093	1093
C11orf46	0.117902	9.34136e-05	0.000202621	1093	1093
C11orf48	0.0410548	0.174999	0.223362	1093	1093
C11orf49	-0.142775	2.14658e-06	5.68669e-06	1093	1093
C11orf51	-0.0952694	0.00161476	0.00297137	1093	1093
C11orf52	0.0150259	0.619737	0.676275	1093	1093
C11orf53	-0.0984645	0.00111612	0.00210474	1093	953
C11orf54	0.114217	0.000154245	0.000325973	1093	1093
C11orf57	0.139306	3.7854e-06	9.74017e-06	1093	1093
C11orf58	0.196741	5.3393e-11	2.35016e-10	1093	1093
C11orf59	-0.0785947	0.00933783	0.0153111	1093	1093
C11orf61	-0.158746	1.3223e-07	4.01671e-07	1093	1093
C11orf63	-0.0188106	0.534446	0.59608	1093	1093
C11orf64	0.0275657	0.362576	0.426081	1093	5
C11orf65	0.0332436	0.272162	0.331505	1093	1084
C11orf66	-0.279576	4.47524e-21	6.10687e-20	1093	1091
C11orf67	-0.138491	4.31715e-06	1.10323e-05	1093	1093
C11orf68	-0.304425	7.16791e-25	1.54183e-23	1093	1093
C11orf70	-0.100127	0.000917116	0.00174844	1093	1088
C11orf71	-0.0429944	0.155477	0.200553	1093	1093
C11orf73	-0.16473	4.31851e-08	1.38466e-07	1093	1093
C11orf74	-0.00661943	0.826966	0.858796	1093	1093
C11orf75	-0.228474	2.07046e-14	1.32435e-13	1093	1093
C11orf80	0.0821131	0.00660387	0.0110982	1093	1093
C11orf82	0.194314	9.25542e-11	3.96394e-10	1093	1093
C11orf83	-0.149422	6.96978e-07	1.94754e-06	1093	1093
C11orf84	-0.153476	3.4251e-07	9.92994e-07	1093	1093
C11orf85	-0.0605289	0.0454287	0.0659475	1093	479
C11orf86	-0.139259	3.81469e-06	9.81111e-06	1093	447
C11orf87	0.00231908	0.938956	0.951609	1093	671
C11orf88	0.0147718	0.625668	0.681861	1093	953
C11orf90	-0.111617	0.000217779	0.000450603	1093	746
C11orf92	-0.133907	8.91274e-06	2.20142e-05	1093	1083
C11orf93	-0.174979	5.77128e-09	2.0325e-08	1093	1074
C11orf94	-0.0429264	0.156132	0.201282	1093	129
C11orf95	-0.19957	2.78681e-11	1.26934e-10	1093	1093
C11orf9	-0.0333975	0.269948	0.329127	1093	1093
C12orf10	-0.113703	0.000165224	0.000347791	1093	1093
C12orf11	0.146156	1.21884e-06	3.31696e-06	1093	1093
C12orf12	0.0783105	0.00959748	0.0156998	1093	33
C12orf23	0.265118	4.88194e-19	5.23937e-18	1093	1093
C12orf24	-0.0284402	0.347544	0.410546	1093	1093
C12orf26	0.141344	2.71706e-06	7.11107e-06	1093	1093
C12orf27	0.00224305	0.940953	0.952915	1093	211
C12orf29	0.306275	3.61147e-25	8.03412e-24	1093	1093
C12orf32	0.112094	0.000204533	0.000425161	1093	1093
C12orf34	0.000930573	0.975485	0.980455	1093	1093
C12orf35	0.0243607	0.421064	0.485223	1093	1093
C12orf36	0.0330885	0.274406	0.333956	1093	291
C12orf39	-0.0752634	0.0128127	0.0205212	1093	481
C12orf40	0.0384989	0.20344	0.255791	1093	179
C12orf41	0.262953	9.62078e-19	1.00262e-17	1093	1093
C12orf42	-0.0595364	0.0490909	0.0708302	1093	724
C12orf43	0.0798776	0.00824186	0.0136462	1093	1093
C12orf44	-0.137257	5.25926e-06	1.32949e-05	1093	1093
C12orf45	-0.0477493	0.114632	0.152401	1093	1093
C12orf47	-0.126295	2.82197e-05	6.57459e-05	1093	1093
C12orf48	0.299139	4.94728e-24	9.67143e-23	1093	1093
C12orf49	0.212168	1.36861e-12	7.16661e-12	1093	1093
C12orf4	0.116503	0.000113197	0.000243126	1093	1093
C12orf50	-0.0266764	0.378272	0.442334	1093	352
C12orf51	0.19049	2.17139e-10	8.90061e-10	1093	1093
C12orf52	-0.0225104	0.45721	0.520861	1093	1093
C12orf53	-0.104362	0.000548749	0.00107619	1093	1083
C12orf54	-0.0930465	0.00207466	0.00375324	1093	587
C12orf56	0.0249555	0.409811	0.473962	1093	404
C12orf57	-0.229644	1.51308e-14	9.8248e-14	1093	1093
C12orf59	0.0120971	0.68953	0.739264	1093	1092
C12orf5	0.13021	1.57236e-05	3.7642e-05	1093	1093
C12orf60	0.0644694	0.0330749	0.0491212	1093	1093
C12orf61	-0.179769	2.15994e-09	7.97904e-09	1093	1091
C12orf62	-0.066147	0.0287608	0.0431722	1093	1093
C12orf63	0.0808629	0.00747974	0.0124652	1093	1019
C12orf65	-0.109561	0.000284608	0.000579421	1093	1093
C12orf66	0.370321	7.37991e-37	7.66712e-35	1093	1093
C12orf68	-0.132055	1.18666e-05	2.8802e-05	1093	1093
C12orf69	-0.0554901	0.0666767	0.0935972	1093	1081
C12orf70	-0.100303	0.000898103	0.00171495	1093	990
C12orf71	-0.0634465	0.0359679	0.0531319	1093	790
C12orf72	0.132226	1.15599e-05	2.81252e-05	1093	1093
C12orf73	0.127062	2.51974e-05	5.90802e-05	1093	1093
C12orf74	0.0973899	0.00126526	0.00236803	1093	617
C12orf75	-0.0276522	0.36107	0.424535	1093	1093
C12orf76	-0.0715778	0.017946	0.0279521	1093	1093
C12orf77	-0.0568981	0.0600464	0.0851798	1093	311
C13orf15	-0.309441	1.10412e-25	2.60886e-24	1093	1093
C13orf16	-0.210103	2.27252e-12	1.16386e-11	1093	983
C13orf18	-0.252757	2.15952e-17	1.92504e-16	1093	1093
C13orf1	0.129353	1.78988e-05	4.26268e-05	1093	1093
C13orf23	0.190409	2.21034e-10	9.05659e-10	1093	1093
C13orf26	-0.0311738	0.303153	0.363941	1093	250
C13orf27	0.0513363	0.0898135	0.122343	1093	1093
C13orf28	0.021041	0.487113	0.550138	1093	23
C13orf29	-0.103464	0.00061288	0.00119522	1093	1093
C13orf30	-0.0132615	0.661423	0.714109	1093	596
C13orf31	0.0611655	0.0432027	0.0629701	1093	1093
C13orf33	-0.11763	9.69937e-05	0.000210047	1093	1093
C13orf34	0.14369	1.84395e-06	4.91729e-06	1093	1093
C13orf35	-0.0891613	0.00317543	0.00559985	1093	241
C13orf36	-0.141307	2.73351e-06	7.15124e-06	1093	572
C13orf37	0.183288	1.03151e-09	3.93825e-09	1093	1093
C13orf38	-0.101572	0.000771355	0.00148559	1093	988
C13orf39	-0.067697	0.0252142	0.038253	1093	292
C14orf101	0.291894	6.55193e-23	1.11627e-21	1093	1093
C14orf102	0.120528	6.47683e-05	0.000143184	1093	1093
C14orf104	0.395679	2.78913e-42	5.91735e-40	1093	1093
C14orf105	0.00579988	0.848111	0.876554	1093	192
C14orf106	0.338996	8.49349e-31	3.75408e-29	1093	1093
C14orf109	0.304675	6.53479e-25	1.4147e-23	1093	1093
C14orf115	-0.15089	5.40038e-07	1.527e-06	1093	312
C14orf118	0.213953	8.7893e-13	4.68522e-12	1093	1093
C14orf119	0.184344	8.23988e-10	3.17664e-09	1093	1093
C14orf126	0.425643	2.50473e-49	1.4023e-46	1093	1093
C14orf128	-0.034535	0.253961	0.312166	1093	1093
C14orf129	0.431022	1.13843e-50	6.74855e-48	1093	1093
C14orf132	-0.000244725	0.993552	0.99444	1093	1093
C14orf135	0.334149	6.41226e-30	2.56427e-28	1093	1093
C14orf138	0.12075	6.27736e-05	0.000139186	1093	1093
C14orf139	-0.245931	1.60647e-16	1.29825e-15	1093	1093
C14orf142	0.193621	1.08172e-10	4.59376e-10	1093	1093
C14orf143	0.334436	5.6941e-30	2.29989e-28	1093	1093
C14orf145	0.216755	4.35257e-13	2.40609e-12	1093	1093
C14orf147	0.269247	1.31554e-19	1.50396e-18	1093	1093
C14orf148	0.0895722	0.00303791	0.00537144	1093	1088
C14orf149	-0.0627377	0.0380968	0.0560591	1093	1093
C14orf153	-0.0307079	0.31044	0.371617	1093	1093
C14orf156	0.0831869	0.00592637	0.0100383	1093	1093
C14orf159	-0.00999591	0.741324	0.786016	1093	1093
C14orf162	0.110003	0.000268788	0.000549156	1093	978
C14orf165	0.0204388	0.499667	0.562362	1093	101
C14orf166B	-0.159423	1.16764e-07	3.5679e-07	1093	265
C14orf166	0.357719	2.4461e-34	1.74827e-32	1093	1093
C14orf167	0.318893	2.94559e-27	8.39722e-26	1093	1093
C14orf169	0.154368	2.92186e-07	8.53728e-07	1093	1093
C14orf174	0.17785	3.21276e-09	1.16337e-08	1093	1093
C14orf176	-0.1252	3.3131e-05	7.64811e-05	1093	1091
C14orf177	-0.049948	0.0988513	0.1335	1093	25
C14orf178	-0.0413271	0.172153	0.220134	1093	660
C14orf179	-0.0195031	0.519506	0.581476	1093	1093
C14orf180	-0.223694	7.321e-14	4.39413e-13	1093	794
C14orf181	-0.274671	2.26968e-20	2.85731e-19	1093	1093
C14orf182	-0.041414	0.171253	0.21908	1093	1086
C14orf183	0.0494468	0.102287	0.137734	1093	287
C14orf184	0.0972178	0.00129078	0.00241086	1093	1004
C14orf19	-0.0664992	0.0279192	0.042031	1093	1064
C14orf1	0.172801	8.94273e-09	3.0879e-08	1093	1093
C14orf21	0.250286	4.49736e-17	3.85393e-16	1093	1093
C14orf23	-0.0705508	0.0196645	0.0304034	1093	93
C14orf28	0.155278	2.48237e-07	7.31682e-07	1093	1093
C14orf2	0.0915814	0.00244038	0.00437596	1093	1093
C14orf33	0.14665	1.12093e-06	3.06006e-06	1093	1093
C14orf34	-0.0309922	0.305981	0.366846	1093	660
C14orf37	0.0189106	0.532277	0.594088	1093	1093
C14orf39	0.0241174	0.42572	0.490056	1093	693
C14orf43	0.146271	1.1954e-06	3.25541e-06	1093	1093
C14orf45	0.106449	0.000423094	0.000842717	1093	1093
C14orf48	-0.0273237	0.366807	0.43035	1093	93
C14orf49	-0.191336	1.80085e-10	7.46488e-10	1093	1092
C14orf4	-0.0704446	0.0198503	0.0306671	1093	1093
C14orf50	0.00761162	0.801536	0.837131	1093	1079
C14orf53	-0.00209015	0.944972	0.956264	1093	448
C14orf64	-0.0640919	0.0341185	0.050563	1093	1046
C14orf68	-0.119739	7.23582e-05	0.00015916	1093	553
C14orf70	0.0314189	0.299366	0.3599	1093	62
C14orf72	-0.239275	1.07256e-15	7.94466e-15	1093	936
C14orf73	-0.160516	9.5376e-08	2.93885e-07	1093	1045
C14orf79	-0.0185206	0.540768	0.602232	1093	1093
C14orf80	-0.139618	3.59946e-06	9.27712e-06	1093	1093
C14orf86	0.0459155	0.129253	0.169812	1093	156
C14orf93	-0.127024	2.53392e-05	5.93919e-05	1093	1093
C15orf17	-0.114262	0.000153317	0.000324113	1093	1093
C15orf21	0.0382414	0.206482	0.259186	1093	1093
C15orf23	0.277933	7.73625e-21	1.03467e-19	1093	1093
C15orf24	0.0465862	0.123746	0.163195	1093	1093
C15orf26	0.0866848	0.00413116	0.00717047	1093	1004
C15orf27	-0.174126	6.85482e-09	2.39734e-08	1093	1093
C15orf28	0.0239204	0.429511	0.493883	1093	1051
C15orf29	0.0683952	0.0237442	0.0361891	1093	1093
C15orf2	-0.0589779	0.0512586	0.073684	1093	125
C15orf32	-0.0698732	0.0208756	0.0321402	1093	175
C15orf33	0.0741173	0.0142489	0.022606	1093	1092
C15orf34	0.0626871	0.0382528	0.0562516	1093	1092
C15orf37	-0.197016	5.0148e-11	2.21167e-10	1093	1093
C15orf38	0.121117	5.96002e-05	0.000132558	1093	1093
C15orf39	-0.0585527	0.052962	0.075947	1093	1093
C15orf40	-0.141594	2.60796e-06	6.84776e-06	1093	1093
C15orf41	-0.0728752	0.0159639	0.0251133	1093	1093
C15orf42	0.1614	8.09189e-08	2.51181e-07	1093	1093
C15orf43	0.0518888	0.0864066	0.118109	1093	73
C15orf44	0.162174	7.00007e-08	2.18738e-07	1093	1093
C15orf48	-0.0835483	0.00571279	0.00970429	1093	1093
C15orf50	0.0609495	0.0439475	0.0639447	1093	722
C15orf51	-0.206539	5.38868e-12	2.649e-11	1093	1010
C15orf52	-0.195126	7.70555e-11	3.32987e-10	1093	1093
C15orf53	-0.0944664	0.00176881	0.00323095	1093	538
C15orf54	-0.0098087	0.746	0.790143	1093	997
C15orf55	-0.146204	1.20904e-06	3.29123e-06	1093	515
C15orf56	-0.0770889	0.0107884	0.0174833	1093	1070
C15orf57	-0.00665569	0.826034	0.858048	1093	1093
C15orf58	0.100041	0.000926481	0.00176518	1093	1093
C15orf59	-0.0575418	0.0572023	0.0815586	1093	1089
C15orf5	-0.0511724	0.0908447	0.123556	1093	495
C15orf60	0.000570941	0.984958	0.987604	1093	163
C15orf61	-0.141443	2.67303e-06	7.00584e-06	1093	1093
C15orf62	-0.180778	1.75028e-09	6.53034e-09	1093	1093
C15orf63	0.0280843	0.353614	0.416789	1093	1093
C16orf11	-0.0962069	0.00145053	0.00268782	1093	389
C16orf13	-0.159428	1.16656e-07	3.5652e-07	1093	1093
C16orf3	-0.0159402	0.598594	0.657081	1093	1040
C16orf42	-0.289602	1.4612e-22	2.3674e-21	1093	1093
C16orf45	-0.0348153	0.250126	0.307921	1093	1093
C16orf46	-0.0693651	0.0218258	0.0334662	1093	1093
C16orf48	-0.32798	7.97606e-29	2.7527e-27	1093	1093
C16orf52	0.0740922	0.0142818	0.0226475	1093	1093
C16orf53	-0.0482012	0.111236	0.148475	1093	1093
C16orf54	-0.127258	2.44771e-05	5.74448e-05	1093	1093
C16orf55	-0.192892	1.27346e-10	5.36957e-10	1093	1093
C16orf57	-0.0798174	0.00829057	0.0137189	1093	1093
C16orf58	-0.0831449	0.00595165	0.0100786	1093	1093
C16orf59	-0.00622098	0.837232	0.867579	1093	1093
C16orf5	-0.369359	1.15955e-36	1.15696e-34	1093	1093
C16orf61	-0.0176878	0.559123	0.619693	1093	1093
C16orf62	0.0139082	0.646013	0.700112	1093	1093
C16orf63	0.18262	1.18827e-09	4.50348e-09	1093	1093
C16orf68	-0.138039	4.64167e-06	1.18137e-05	1093	1093
C16orf70	0.123967	3.96368e-05	9.0494e-05	1093	1093
C16orf71	-0.0436207	0.149539	0.193562	1093	1093
C16orf72	0.239751	9.38167e-16	6.98513e-15	1093	1093
C16orf73	0.00797682	0.792226	0.829428	1093	719
C16orf74	-0.157897	1.54493e-07	4.65999e-07	1093	1093
C16orf75	0.112491	0.000194098	0.000404806	1093	1093
C16orf78	-0.00489997	0.871454	0.89668	1093	36
C16orf79	-0.320035	1.8842e-27	5.50377e-26	1093	1092
C16orf7	-0.405225	1.89643e-44	5.46037e-42	1093	1093
C16orf80	-0.131594	1.27358e-05	3.08003e-05	1093	1093
C16orf81	-0.0697448	0.0211123	0.0324847	1093	548
C16orf82	-0.0920804	0.00230967	0.00415452	1093	136
C16orf86	-0.383378	1.36627e-39	1.81166e-37	1093	1093
C16orf87	0.150824	5.46257e-07	1.54394e-06	1093	1093
C16orf88	0.186706	4.96107e-10	1.96098e-09	1093	1093
C16orf89	-0.0909371	0.00261914	0.00467695	1093	1090
C16orf90	-0.168945	1.91554e-08	6.38566e-08	1093	219
C16orf91	-0.067731	0.0251407	0.0381559	1093	1093
C16orf92	-0.0703926	0.0199418	0.0308013	1093	233
C16orf93	-0.235033	3.49168e-15	2.45037e-14	1093	1093
C17orf100	-0.235199	3.33525e-15	2.3455e-14	1093	1093
C17orf101	-0.20578	6.46273e-12	3.14933e-11	1093	1093
C17orf102	-0.115206	0.000135006	0.000287	1093	426
C17orf103	-0.190925	1.97245e-10	8.12815e-10	1093	1093
C17orf104	0.0688602	0.0228069	0.0348712	1093	1093
C17orf105	0.031289	0.301369	0.361984	1093	102
C17orf106	-0.22897	1.81293e-14	1.16628e-13	1093	1093
C17orf107	-0.203298	1.16545e-11	5.52566e-11	1093	1093
C17orf108	-0.202157	1.52462e-11	7.13624e-11	1093	1093
C17orf28	0.294622	2.49844e-23	4.48008e-22	1093	1093
C17orf37	0.171607	1.13408e-08	3.87086e-08	1093	1093
C17orf39	-0.115484	0.000130024	0.00027708	1093	1093
C17orf42	0.0795287	0.00852788	0.0140735	1093	1093
C17orf44	-0.202433	1.42899e-11	6.71359e-11	1093	1093
C17orf46	-0.101152	0.000811291	0.0015567	1093	1046
C17orf47	-0.110798	0.000242406	0.000498184	1093	1052
C17orf48	-0.251302	3.32952e-17	2.90128e-16	1093	1093
C17orf49	-0.346446	3.53976e-32	1.84351e-30	1093	1093
C17orf50	-0.000436327	0.988504	0.990519	1093	767
C17orf51	-0.172594	9.31978e-09	3.20875e-08	1093	1093
C17orf53	0.068208	0.0241307	0.0367338	1093	1093
C17orf54	0.0330465	0.275016	0.334578	1093	270
C17orf55	-0.161147	8.48257e-08	2.6258e-07	1093	1071
C17orf56	-0.310707	6.84718e-26	1.6488e-24	1093	1093
C17orf57	0.0451895	0.135426	0.177091	1093	1093
C17orf58	0.210115	2.26621e-12	1.16104e-11	1093	1093
C17orf59	-0.303637	9.58526e-25	2.04219e-23	1093	1093
C17orf60	-0.233964	4.68372e-15	3.23178e-14	1093	1092
C17orf61	-0.0948819	0.00168749	0.00309476	1093	1093
C17orf62	-0.211569	1.58622e-12	8.24187e-12	1093	1093
C17orf63	0.0369054	0.222795	0.277752	1093	1093
C17orf64	-0.100004	0.000930578	0.00177226	1093	599
C17orf65	-0.228173	2.24373e-14	1.42837e-13	1093	1093
C17orf66	-0.143776	1.81783e-06	4.85084e-06	1093	559
[truncated: 18,157 more rows]
